# Supplementary material for: Fine-tuning of the optical output in a dual responsive catenane switch
Source: Royal Society of Chemistry journal article supplement (doi:10.1039/d1cc00310k), 2021-01-01
Supplement: d1cc00310k1.pdf [file d1cc00310k1.pdf]

*Electronic Supplementary Information for*

## **Fine-Tuning of the Optical Output in a Dual Responsive Catenane Switch**

Yulin Deng,<sup>a</sup> Samuel Kin-Man Lai,<sup>a</sup> Linghui Kong<sup>a</sup> and Ho Yu Au-Yeung<sup>\*a,b</sup>

<sup>a</sup>*Department of Chemistry, The University of Hong Kong, Pokfulam Road, Hong Kong, P. R. China*

<sup>b</sup>*State Key Laboratory of Synthetic Chemistry and CAS-HKU Joint Laboratory of Metallomics on Health and Environment, The University of Hong Kong, Pokfulam Road, Hong Kong, P. R. China*

Email: [hoyuay@hku.hk](mailto:hoyuay@hku.hk)

## 1. Synthesis

*General.* All reagents were purchased from commercial suppliers (Dkmchem, J & K, Aldrich and Energy) and used without further purification unless otherwise noted. All the solvents were of analytical grade (ACI Labscan and DUKSAN Pure Chemicals). MeCN, CHCl<sub>3</sub> and MeOH were distilled over CaH<sub>2</sub> before use. **Phen-CHO** was synthesized according to literature procedures.<sup>1</sup> Thin layer chromatography (TLC) was performed on silica gel 60 F254 (Merck, Germany, Aluminium sheet) and column chromatography was carried out using silica gel 60F (Silicycle, Canada). ESI-MS were carried out using a Waters-Acquity UPLC H-Class system coupled with a QDa MS detector. HRMS spectra were obtained from a Waters Micromass Q-ToF Premier quadrupole time-of-flight tandem mass spectrometer. NMR spectra were recorded on Bruker DPX spectrometers with working frequencies of 400 MHz or 500 MHz for <sup>1</sup>H, and 100 MHz or 125 MHz for <sup>13</sup>C, respectively. Chemical shifts are reported in ppm and referenced to solvent residues (for <sup>1</sup>H: CDCl<sub>3</sub>: δ = 7.26 ppm, d<sub>6</sub>-DMSO: δ = 2.50 ppm, CD<sub>3</sub>OD: δ = 3.31 ppm; For <sup>13</sup>C: CDCl<sub>3</sub>: δ = 77.16 ppm, d<sub>6</sub>-DMSO: δ = 39.52 ppm, CD<sub>3</sub>OD: δ = 49.00 ppm).

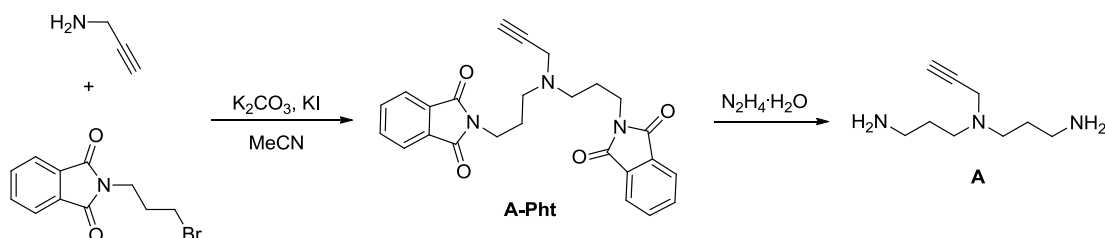

**Scheme S1.** Synthesis of **A-Pht** and **A**.

*Synthesis of A-Pht.* A mixture of propargylamine (0.55 g, 10 mmol), N-(3-bromopropyl)phthalimide (6.70 g, 25 mmol), K<sub>2</sub>CO<sub>3</sub> (4.14 g, 30 mmol) and KI (0.17 g, 1 mmol) in MeCN (100 mL) was heated at 80 °C for overnight. The reaction was cooled to room temperature and filtered, and the solvents were removed by a rotary evaporator. The residue was re-dissolved in 80 mL CH<sub>2</sub>Cl<sub>2</sub>, washed with water (2 x 100 mL) and brine (100 mL), dried over anhydrous MgSO<sub>4</sub> and filtered. Solvents were removed from the filtrate by a rotary evaporator and the residue was purified by a silica column using hexane/ethyl

acetate/CH<sub>2</sub>Cl<sub>2</sub> = 12:8:1 as the eluent. The product was obtained as a white solid. Yield: 3.56 g, 83%. <sup>1</sup>H NMR (400 MHz, DMSO-*d*<sub>6</sub>, 298 K) δ 7.86–7.79 (m, 8H), 3.58 (t, *J* = 7.1 Hz, 4H), 3.00 (t, *J* = 2.1 Hz, 1H), 2.42 (t, *J* = 6.8 Hz, 4H), 1.66 (quint, *J* = 6.9 Hz, 4H). <sup>13</sup>C{<sup>1</sup>H} NMR (100 MHz, DMSO-*d*<sub>6</sub>, 298 K) δ 168.0, 134.3, 131.7, 123.0, 78.4, 75.7, 50.3, 35.7, 25.6. HRMS (ESI+): *m/z* calcd. for C<sub>25</sub>H<sub>23</sub>N<sub>3</sub>O<sub>4</sub> [M+H]<sup>+</sup>: 430.1761, found: 430.1759.

**Synthesis of A.** Under an argon atmosphere, a mixture of **A-Pht** (1.0 g, 2.3 mmol) and hydrazine hydrate (0.7 mL, 14 mmol) in 50 mL MeOH was stirred for 24 hours at room temperature. The reaction mixture was filtered and solvents were removed from the filtrate using a rotary evaporator. The residue was re-dissolved in 30 mL CH<sub>2</sub>Cl<sub>2</sub> and filtered, and the solvent was removed from the filtrate. If white solid was observed, the residue was re-dissolved in CH<sub>2</sub>Cl<sub>2</sub> and filtered until a yellow oil was obtained upon solvent removal. Yield: 0.34 g, 88%. <sup>1</sup>H NMR (400 MHz, CD<sub>3</sub>OD, 298 K) δ 3.39 (s, 1H), 3.28–3.26 (m, 2H), 2.63 (t, *J* = 7.1 Hz, 4H), 2.57–2.45 (m, 4H), 1.66–1.54 (m, 4H). <sup>13</sup>C{<sup>1</sup>H} NMR (100 MHz, DMSO-*d*<sub>6</sub>, 298 K) δ 52.5, 49.9, 42.2, 40.9, 31.1. HRMS (ESI+): *m/z* calcd. for C<sub>9</sub>H<sub>19</sub>N<sub>3</sub> [M+H]<sup>+</sup>: 170.1652, found: 170.1651.

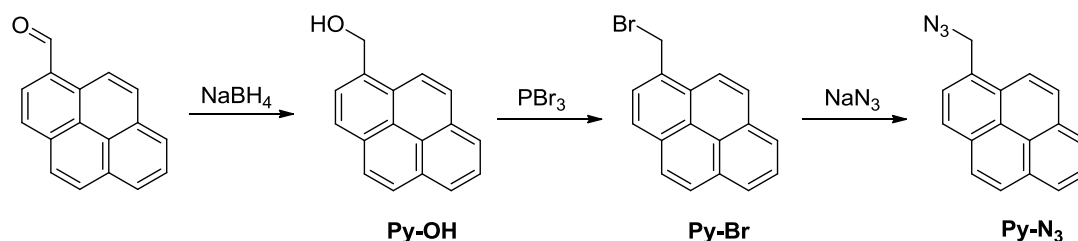

**Scheme S2.** Synthesis of **Py-OH** and **Py-N<sub>3</sub>**.

**Synthesis of Py-OH.** To a solution of 1-pyrenecarboxaldehyde (0.50 g, 2.2 mmol) in tetrahydrofuran (15 mL) cooled in an ice bath, NaBH<sub>4</sub> (0.2 mg, 4 mmol) was added. The reaction mixture was warmed to room temperature and stirred for overnight. Solvents were removed by a rotary evaporator and the residue was re-dissolved in 30 mL CH<sub>2</sub>Cl<sub>2</sub>, washed with water (2 x 50 mL) and brine (50 mL), dried over anhydrous Na<sub>2</sub>SO<sub>4</sub>, and filtered. Solvents were removed from the filtrate to afford the product as a yellow powder.

Yield: 0.49 g, 95%.  $^1\text{H}$  NMR (400 MHz, DMSO- $d_6$ , 298 K)  $\delta$  8.39 (d,  $J = 9.2$  Hz, 1H), 8.32–8.26 (m, 3H), 8.23 (d,  $J = 9.3$  Hz, 1H), 8.14 (m,  $J = 8.0, 3.0$  Hz, 3H), 8.07 (t,  $J = 7.6$  Hz, 1H), 5.52 (t,  $J = 5.5$  Hz, 1H), 5.25 (d,  $J = 5.5$  Hz, 2H).  $^{13}\text{C}\{^1\text{H}\}$  NMR (100 MHz, DMSO- $d_6$ , 298 K)  $\delta$  136.0, 130.8, 130.4, 123.0, 127.7, 127.5, 127.2, 126.8, 126.2, 125.6, 125.1, 125.1, 124.7, 124.0, 123.9, 123.5, 61.3. HRMS (ESI+):  $m/z$  calcd. for  $\text{C}_{17}\text{H}_{12}\text{O}$   $[\text{M}+\text{Na}]^+$ : 255.0780, found: 255.0780.

*Synthesis of Py-N<sub>3</sub>*. To a solution of **Py-OH** (0.49 g, 2.1 mmol) in toluene (40 mL) cooled in an ice bath, a solution of  $\text{PBr}_3$  (0.3 mL, 3.2 mmol) in toluene (10 mL) was added dropwisely. The mixture was warmed to room temperature and stirred for overnight. A saturated aq.  $\text{NaHCO}_3$  solution was added slowly until no gas evolution was observed. The organic phase was separated and the aqueous phase was extracted by  $\text{CH}_2\text{Cl}_2$  (30 mL) and combined with the toluene solution, washed with water (2 x 50 mL) and brine (50 mL), dried over anhydrous  $\text{Na}_2\text{SO}_4$ , and filtered. Solvents were removed from the filtrate to afford the **Py-Br** as a yellow powder which was used in the next step without further purification. The obtained **Py-Br** was dissolved in *N,N*-dimethylformamide (20 mL) and  $\text{NaN}_3$  (0.28 g, 3.2 mmol) was added, the reaction mixture was stirred at room temperature for overnight. Water (100 mL) was added to the reaction mixture and the organic components were extracted by  $\text{CH}_2\text{Cl}_2$  (50 mL). The organic layer was washed with water (2 x 100 mL) and brine (100 mL), dried over anhydrous  $\text{Na}_2\text{SO}_4$ , and filtered. Solvents were removed from the filtrate using a rotary evaporator to afford **Py-N<sub>3</sub>** as a yellow powder. Yield: 0.50 g, 92%.  $^1\text{H}$  NMR (400 MHz, DMSO- $d_6$ , 298 K)  $\delta$  8.42–8.31 (m, 5H), 8.25–8.18 (m, 2H), 8.18–8.10 (m, 2H), 5.23 (s, 2H).  $^{13}\text{C}\{^1\text{H}\}$  NMR (100 MHz, DMSO- $d_6$ , 298 K) 131.1, 130.7, 130.3, 129.0, 128.8, 128.1, 128.1, 127.8, 127.4, 126.5, 125.7, 125.6, 124.8, 124.1, 123.8, 123.2, 51.7. HRMS (EI+):  $m/z$  calcd. for  $\text{C}_{17}\text{H}_{11}\text{N}_3$   $[\text{M}]^+$ : 257.0953, found: 257.0953.

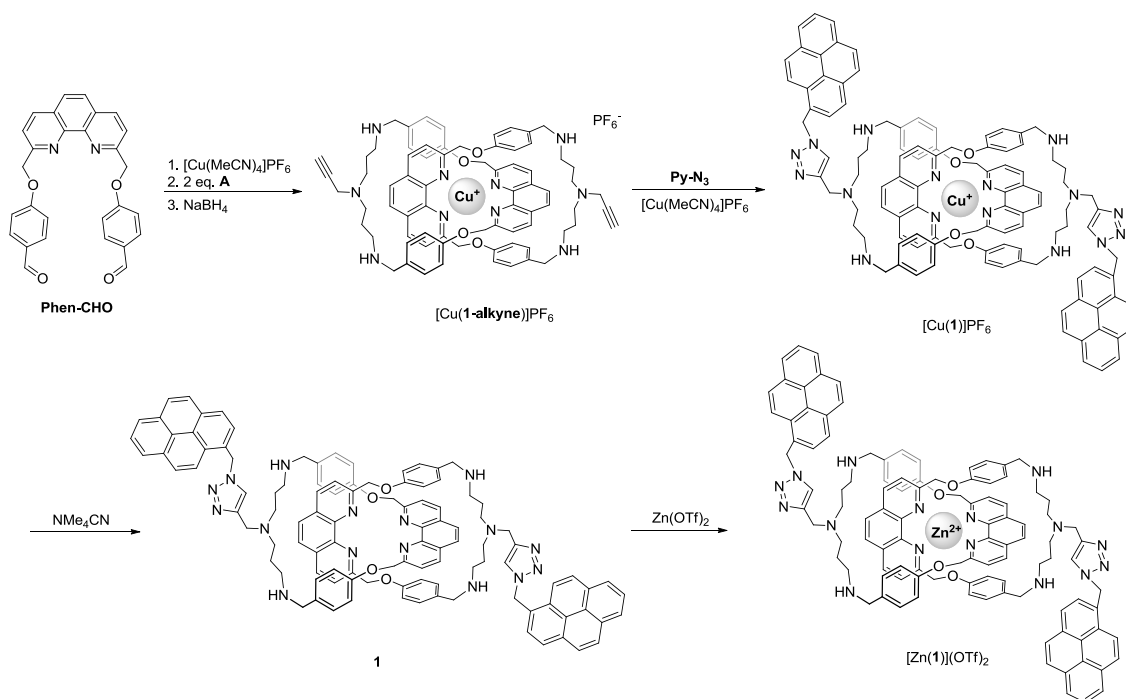

**Scheme S3.** Synthesis of [Cu(1-alkyne)]PF<sub>6</sub>, [Cu(1)]PF<sub>6</sub>, **1** and [Zn(1)](OTf)<sub>2</sub>.

*Synthesis of [Cu(1-alkyne)]PF<sub>6</sub>.* Under an argon atmosphere, a mixture of **Phen-CHO** (0.54 g, 1.2 mmol) and [Cu(CH<sub>3</sub>CN)<sub>4</sub>]PF<sub>6</sub> (0.22 g, 0.6 mmol) in 300 mL of 5:3:2 CHCl<sub>3</sub>/CH<sub>3</sub>CN/CH<sub>3</sub>OH (150 mL/90 mL/60 mL) solvent mixture was stirred until a clear red solution was obtained, followed by addition of **A** (0.25 g, 1.5 mmol) and piperidine (0.5 mL). The reaction mixture was heated to 60 °C for 4 hours. An additional amount of **A** (0.05 g, 0.3 mmol) was added and the mixture was heating for another 4 hours. The reaction mixture was cooled in an ice bath and NaBH<sub>4</sub> (0.11 g, 3 mmol) was added. The mixture was stirred in the ice bath for 1 hour and warmed to room temperature. Solvents were removed by a rotary evaporator and the dark red residue was re-dissolved in 50 mL CH<sub>2</sub>Cl<sub>2</sub>, washed with water (2 x 100 mL) and brine (100 mL), dried over anhydrous Na<sub>2</sub>SO<sub>4</sub> and filtered. The solvent was removed by a rotary evaporator to afford an orange solid, which was washed by ethyl acetate (3 x 20 mL) and re-dissolved in 30 mL CH<sub>3</sub>CN (30 mL). The solution was filtered, and the solvent was removed to afford [Cu(1-alkyne)]PF<sub>6</sub> as an orange powder which was further dried under vacuum. Yield: 0.43 g, 52%. <sup>1</sup>H NMR (400 MHz, DMSO-*d*<sub>6</sub>, 298 K) δ 8.55 (d, *J* = 8.1 Hz, 4H), 8.05 (d, *J* =

8.2 Hz, 4H), 7.91 (s, 4H), 6.40 (d,  $J = 8.3$  Hz, 8H), 5.79 (d,  $J = 8.3$  Hz, 8H), 4.84 (s, 8H), 3.53 (s, 4H), 3.15 (s, 2H), 2.67 (t,  $J = 6.5$  Hz, 8H), 1.73–1.66 (m, 8H)  $^{13}\text{C}\{^1\text{H}\}$  NMR (100 MHz, DMSO- $d_6$ , 298 K)  $\delta$  155.7, 153.6, 142.5, 137.5, 132.4, 128.2, 127.5, 126.4, 125.6, 112.2, 78.1, 75.9, 70.6, 52.1, 52.0, 46.6, 27.8. HRMS (ESI+):  $m/z$  calcd. for  $\text{C}_{74}\text{H}_{78}\text{N}_{10}\text{O}_4\text{Cu}$   $[\text{M}]^+$ : 1233.5498, found: 1233.5500.

*Synthesis of [Cu(1)]PF<sub>6</sub>*. A mixture of [Cu(1-alkyne)]PF<sub>6</sub> (69 mg, 0.05 mmol), **Py-N<sub>3</sub>** (29 mg, 0.11 mmol) and [Cu(CH<sub>3</sub>CN)<sub>4</sub>]PF<sub>6</sub> (2 mg, 0.005 mmol) in 5 mL MeCN was stirred at room temperature for 24 hours under an argon atmosphere. The orange precipitate formed was collected by filtration and was washed by ethyl acetate (2 x 20 mL) and diethyl ether (10 mL). The orange solid was dried under vacuum. Yield: 49 mg, 52%.  $^1\text{H}$  NMR (500 MHz, DMSO- $d_6$ , 298 K)  $\delta$  8.55 (d,  $J = 9.3$  Hz, 2H), 8.49 (d,  $J = 8.1$  Hz, 4H), 8.35–8.31 (m, 8H), 8.20 (q,  $J = 9.0$  Hz, 4H), 8.12–8.08 (m, 4H), 8.03 (d,  $J = 7.9$  Hz, 2H), 8.00 (d,  $J = 8.2$  Hz, 4H), 7.83 (s, 4H), 6.42 (s, 4H), 6.32 (d,  $J = 8.1$  Hz, 8H), 5.74 (d,  $J = 8.3$  Hz, 8H), 4.78 (s, 8H), 3.80 (s, 4H), 3.21 (s, 8H), 2.39 (br, 8H), 1.72 (br, 8H).  $^{13}\text{C}\{^1\text{H}\}$  NMR (126 MHz, DMSO- $d_6$ , 298 K)  $\delta$  155.7, 153.6, 142.4, 137.5, 132.4, 131.0, 130.8, 130.2, 129.4, 128.4, 128.2, 128.1, 127.8, 127.6, 127.5, 127.3, 126.5, 126.4, 125.8, 125.6, 125.5, 125.1, 124.1, 124.1, 123.8, 122.8, 121.7, 112.3, 70.6, 52.1, 50.9, 47.0, 45.1, 30.7, 27.7. HRMS (ESI+):  $m/z$  calcd. for  $\text{C}_{108}\text{H}_{101}\text{N}_{16}\text{O}_4\text{Cu}$   $[\text{M}+\text{H}]^{2+}$ : 874.8754, found: 874.8781.

*Synthesis of 1*. To a suspension of [Cu(1)]PF<sub>6</sub> (92 mg, 0.05 mmol) in 5 mL MeCN was added (NMe<sub>4</sub>)CN (100 mg, 1.0 mmol) and the mixture was stirred at room temperature for 12 hours. The white solid formed was collected by filtration and washed by deionized water (3 x 10 mL) and dried under vacuum to afford **1** as a white powder. Yield: 80 mg, 95%.  $^1\text{H}$  NMR (500 MHz, DMSO- $d_6$ , 298 K)  $\delta$  8.39 (d,  $J = 8.2$  Hz, 4H), 8.26–8.23 (m, 4H), 8.12 (t,  $J = 9.0$  Hz, 8H), 8.05 (d,  $J = 6.3$  Hz, 4H), 8.01 (s, 2H), 7.85 (s, 4H), 7.71 (d,  $J = 8.2$  Hz, 6H), 6.67 (d,  $J = 8.3$  Hz, 8H), 6.55 (d,  $J = 8.2$  Hz, 8H), 6.20 (s, 4H), 5.12 (s, 8H), 3.14 (s, 8H), 1.95 (br, 8H), 1.88 (br, 8H), 1.19 (br, 8H).  $^{13}\text{C}\{^1\text{H}\}$  NMR (126 MHz, DMSO- $d_6$ , 298 K)  $\delta$  157.0, 156.6, 144.7, 143.8, 137.0, 133.1, 130.8, 130.7, 130.1, 129.2, 128.7, 128.1,

128.0, 127.9, 127.6, 127.2, 126.8, 126.4, 126.4, 125.6, 125.5, 124.8, 123.9, 123.9, 123.6, 122.4, 122.2, 114.7, 72.5, 52.2, 52.0, 50.7, 46.1, 45.8, 27.1. HRMS (ESI+):  $m/z$  calcd. for  $C_{108}H_{102}N_{16}O_4$   $[M+2H]^{2+}$ : 843.9145, found: 843.9163.

**Synthesis of  $[Zn(1)](OTf)_2$ .** A mixture of **1** (26 mg, 0.014 mmol) and  $Zn(OTf)_2$  (7 mg, 0.02 mmol) were in 4 mL of 1:1  $CH_2Cl_2/CH_3CN$  (2 mL/2 mL) was stirred at room temperature for overnight. Diethyl ether (20 mL) was added and the white precipitate formed collected by filtration and washed by diethyl ether (2 x 20 mL). The white powder was dried under vacuum to afford  $[Zn(1)](OTf)_2$ . Yield: 24 mg, 92%.  $^1H$  NMR (500 MHz,  $DMSO-d_6$ , 298 K)  $\delta$  8.67 (d,  $J = 8.2$  Hz, 4H), 8.58 (d,  $J = 9.3$  Hz, 2H), 8.37–8.33 (m, 8H), 8.20 (m, 6H), 8.11 (m, 6H), 8.07 (d,  $J = 7.9$  Hz, 2H), 7.82 (s, 4H), 6.42 (d,  $J = 14.5$  Hz, 12H), 5.73 (d,  $J = 7.6$  Hz, 8H), 5.27 (s, 8H), 3.88 (s, 4H), 2.36 (br, 8H), 1.76 (br, 8H).  $^{13}C\{^1H\}$  NMR (100 MHz,  $DMSO-d_6$ , 298 K)  $\delta$  156.1, 141.3, 138.5, 131.1, 130.8, 130.2, 129.3, 128.5, 128.3, 127.9, 127.6, 127.3, 126.9, 126.7, 125.9, 125.7, 125.5, 125.4, 125.4, 125.2, 125.1, 124.6, 124.1, 123.7, 122.8, 122.3, 119.1, 115.9, 115.8, 115.8, 70.7, 70.7, 70.6, 51.0, 30.0. HRMS (ESI+):  $m/z$  calcd. for  $C_{108}H_{100}N_{16}O_4Zn$   $[M]^{2+}$ : 875.3708, found: 875.3734.

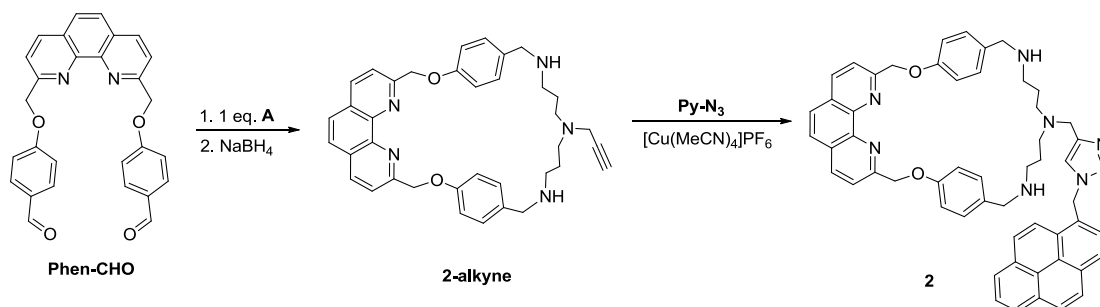

#### Scheme S4. Synthesis of **2-alkyne** and **2**.

**Synthesis of 2-alkyne.** A mixture of **Phen-CHO** (180 mg, 0.4 mmol) and **A** (102 mg, 0.6 mmol) and piperidine (0.5 mL) in 250 mL of 5:3:2  $CHCl_3/CH_3CN/CH_3OH$  (125 mL/75 mL/50 mL) solvent mixture was heated at 60 °C for overnight. The reaction mixture was cooled in an ice bath and  $NaBH_4$  (46 mg, 1.2 mmol) was added and the mixture was stirred in the ice bath for 1 hour. The mixture was warmed to room temperature and

solvents were removed by a rotary evaporator. The yellow residue was purified by a silica column using CH<sub>2</sub>Cl<sub>2</sub>/CH<sub>3</sub>OH/Et<sub>3</sub>N = 40:1:1 as the eluent to afford **2-alkyne** as a light yellow solid. Yield: 105 mg, 45%. <sup>1</sup>H NMR (400 MHz, CDCl<sub>3</sub>, 298 K) δ 8.24 (d, *J* = 8.3 Hz, 2H), 7.84 (d, *J* = 8.3 Hz, 2H), 7.77 (s, 2H), 7.23–7.13 (m, 8H), 5.64 (s, 4H), 3.67 (s, 4H), 3.33 (d, *J* = 2.3 Hz, 1H), 2.64 (t, *J* = 6.5 Hz, 4H), 2.51 (t, *J* = 6.9 Hz, 4H), 1.66–1.58 (m, 4H), 1.25 (s, 2H). <sup>13</sup>C{<sup>1</sup>H} NMR (100 MHz, CDCl<sub>3</sub>, 298 K) δ 158.1, 158.0, 145.4, 137.1, 129.5, 128.3, 126.5, 122.2, 115.9, 115.9, 73.1, 72.6, 53.2, 52.1, 47.6, 41.66, 27.4, 27.0. HRMS (ESI+): *m/z* calcd. for C<sub>37</sub>H<sub>39</sub>N<sub>5</sub>O<sub>2</sub> [M+Na]<sup>+</sup>: 608.2996, found: 608.2988.

*Synthesis of 2.* A mixture of **2-alkyne** (25 mg, 0.04 mmol), **Py-N<sub>3</sub>** (13 mg, 0.05 mmol) and [Cu(CH<sub>3</sub>CN)<sub>4</sub>]PF<sub>6</sub> (2 mg, 0.005 mmol) in 4 mL 3:1 CH<sub>2</sub>Cl<sub>2</sub>/CH<sub>3</sub>OH (3 mL/1 mL) solvent mixture was stirred at room temperature for overnight. A aqueous solution of ethylenediaminetetraacetic acid (EDTA) (29 mg, 0.1 mmol, 4 mL) was added and the reaction mixture was stirred for 1 hour. Solvents were removed by a rotary evaporator, and the yellow residue was re-dissolved in 10 mL CH<sub>2</sub>Cl<sub>2</sub>, washed with water (2 x 10 mL) and brine (10 mL), dried over anhydrous Na<sub>2</sub>SO<sub>4</sub> and filtered. Solvents were removed from the filtrate by a rotary evaporator and the yellow residue was purified by a silica column using CH<sub>2</sub>Cl<sub>2</sub>/CH<sub>3</sub>OH/Et<sub>3</sub>N = 40:1:1 as the eluent to afford **2** as a white solid. Yield: 31 mg, 92%. <sup>1</sup>H NMR (500 MHz, DMSO-*d*<sub>6</sub>, 298 K) δ 8.47 (d, *J* = 8.2 Hz, 2H), 8.41 (d, *J* = 9.3 Hz, 1H), 8.28 (d, *J* = 7.7 Hz, 2H), 8.23 (dd, *J* = 8.6, 4.2 Hz, 2H), 8.14 (q, *J* = 9.0 Hz, 2H), 8.05 (t, *J* = 7.6 Hz, 1H), 7.93–7.88 (m, 5H), 7.84 (s, 1H), 7.11 (q, *J* = 8.8 Hz, 8H), 6.27 (s, 2H), 5.49 (s, 4H), 3.53 (s, 4H), 2.32 (t, *J* = 6.5 Hz, 4H), 2.26 (t, *J* = 6.5 Hz, 4H), 1.48–1.41 (m, 4H). <sup>13</sup>C{<sup>1</sup>H} NMR (126 MHz, DMSO-*d*<sub>6</sub>, 298 K) δ 157.2, 157.1, 144.6, 144.2, 137.2, 133.1, 131.0, 130.7, 130.2, 129.2, 129.0, 128.4, 128.2, 127.9, 127.8, 127.4, 127.3, 126.5, 125.7, 125.6, 125.0, 124.0, 123.7, 123.6, 122.7, 122.6, 115.2, 71.6, 52.3, 51.3, 50.8, 47.7, 46.8, 26.6. HRMS (ESI+): *m/z* calcd. for C<sub>54</sub>H<sub>51</sub>N<sub>8</sub>O<sub>2</sub> [M+H]<sup>+</sup>: 843.4129, found: 843.4154.



## 2. UV-Vis and Fluorescence Spectroscopy

UV-Vis spectra were recorded by a Hitachi UH5300 UV-Vis spectrophotometer. Fluorescence spectra were recorded on an Edinburgh Instruments FS5 Spectrophotometer equipped with a 150 W CW Ozone-free xenon arc lamp and a Photomultiplier R928P detection unit with spectral coverage of 200–870 nm. Samples for emission measurement were contained in a quartz cuvette with a path length of 1 cm and 1.5 mL cell volume. The samples were excited at 340 nm and emission spectra were collected from 360 nm to 600 nm. Millipore water was used to prepare all aqueous solutions. Stock solutions of **1**, **2**, [Cu(**1**)]PF<sub>6</sub>, [Zn(**1**)](OTf)<sub>2</sub> at 1 mM were prepared in DMSO. Stock solutions of trifluoroacetic acid (1 mM), sodium chloride (100 mM), calcium chloride (1 mM) and lithium chloride (1 mM) were prepared in Millipore water. Samples for measurement were diluted by Millipore water and DMSO to the required concentrations and solvent composition. All the samples were mixed with a plastic disposable pipette prior to the collection of absorption and emission spectra.

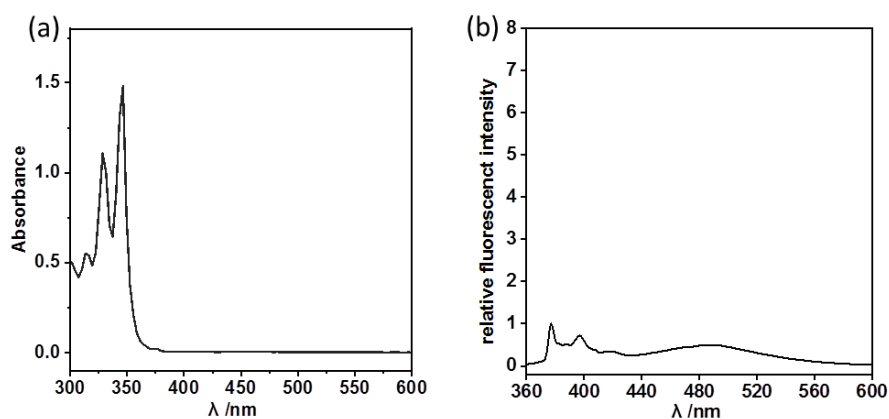

**Fig. S1.** (a) UV-Vis and (b) fluorescent spectra of a 25  $\mu$ M solution of **1** in DMSO at 298 K.

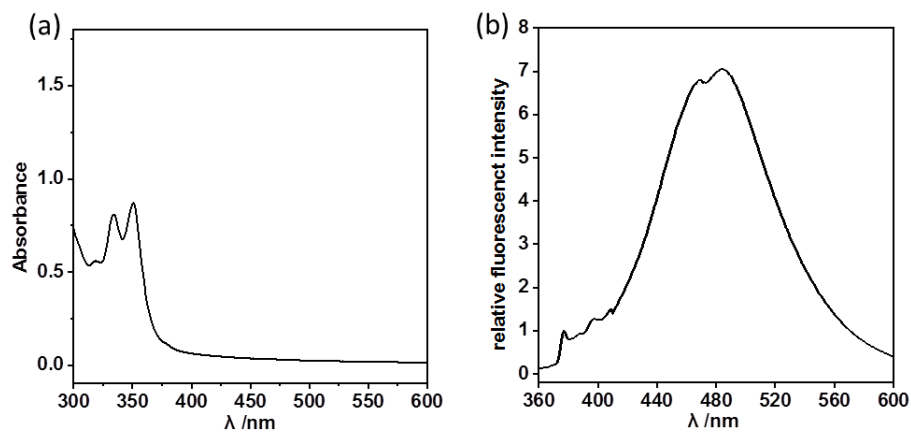

**Fig. S2.** (a) UV-Vis and (b) fluorescent spectra of a 25  $\mu\text{M}$  solution of **1** in 90% (v/v)  $\text{H}_2\text{O}/\text{DMSO}$  at 298 K.

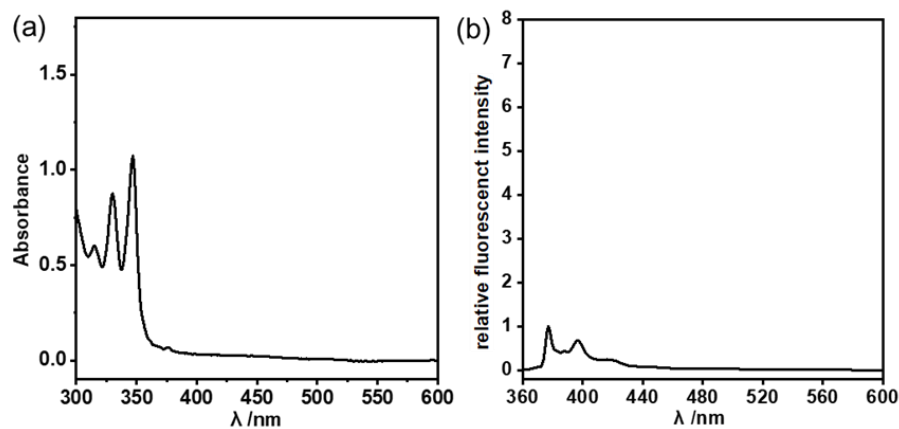

**Fig. S3.** (a) UV-Vis and (b) fluorescent spectra of a 50  $\mu\text{M}$  solution of **2** in DMSO at 298 K.

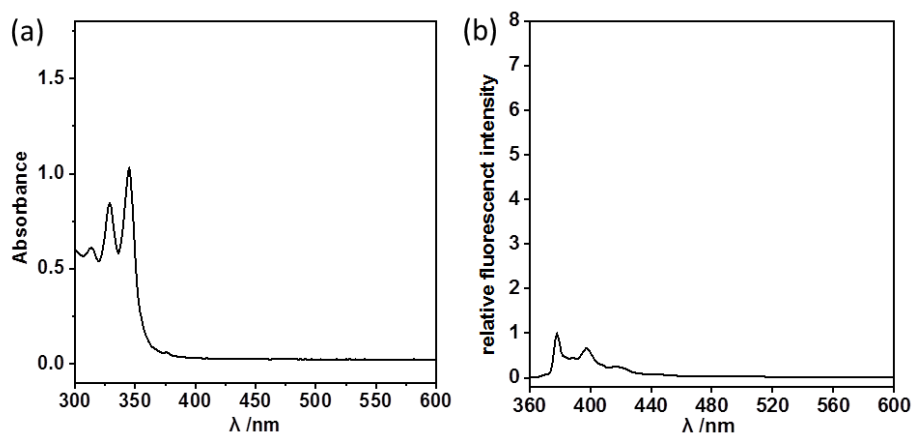

**Fig. S4.** (a) UV-Vis and (b) fluorescent spectra of a 25  $\mu\text{M}$  solution of  $[\text{Zn}(\mathbf{1})](\text{OTf})_2$  in DMSO at 298 K.

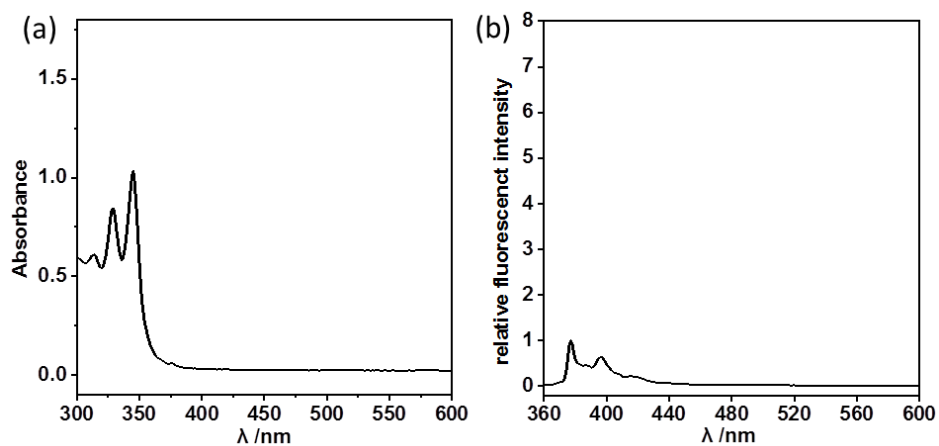

**Fig. S5.** (a) UV-Vis and (b) fluorescent spectra of a 25  $\mu\text{M}$  solution of  $[\text{Zn}(\mathbf{1})](\text{OTf})_2$  in 90% (v/v)  $\text{H}_2\text{O}/\text{DMSO}$  at 298 K.

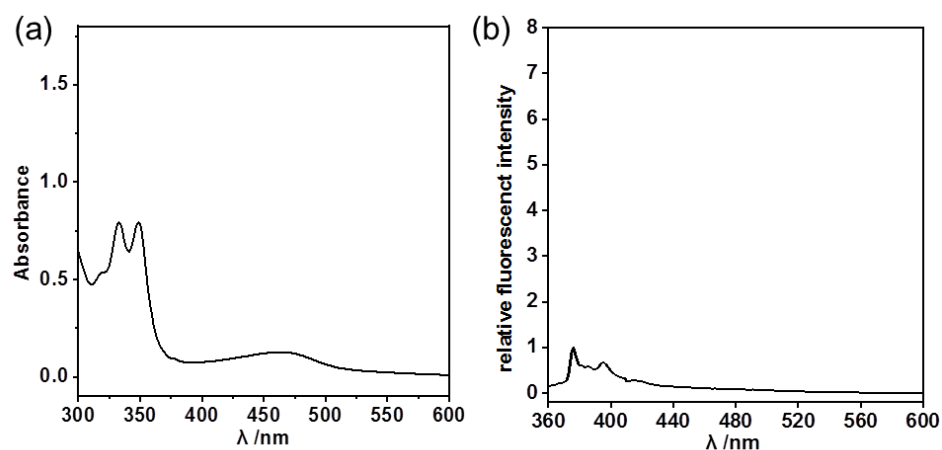

**Fig. S6.** (a) UV-Vis and (b) fluorescent spectra of a 25  $\mu\text{M}$  solution of  $[\text{Cu}(\mathbf{1})]\text{PF}_6$  in 90% (v/v)  $\text{H}_2\text{O}/\text{DMSO}$  at 298 K.

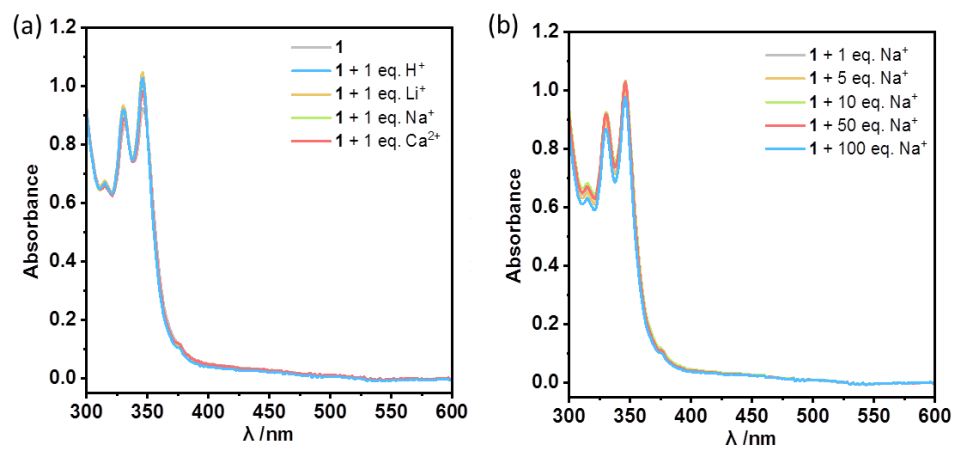

**Fig. S7.** UV-Vis spectra of 25  $\mu\text{M}$  solutions of  $\mathbf{1}$  in the presence of (a) 1 eq. of  $\text{Li}^+$ ,  $\text{Na}^+$ ,  $\text{Ca}^{2+}$  and  $\text{CF}_3\text{COOH}$ ; and (b) 1 eq. 5 eq. 10 eq. 50 eq. and 100 eq. of  $\text{Na}^+$  in 90% (v/v)  $\text{H}_2\text{O}/\text{DMSO}$  at 298 K.

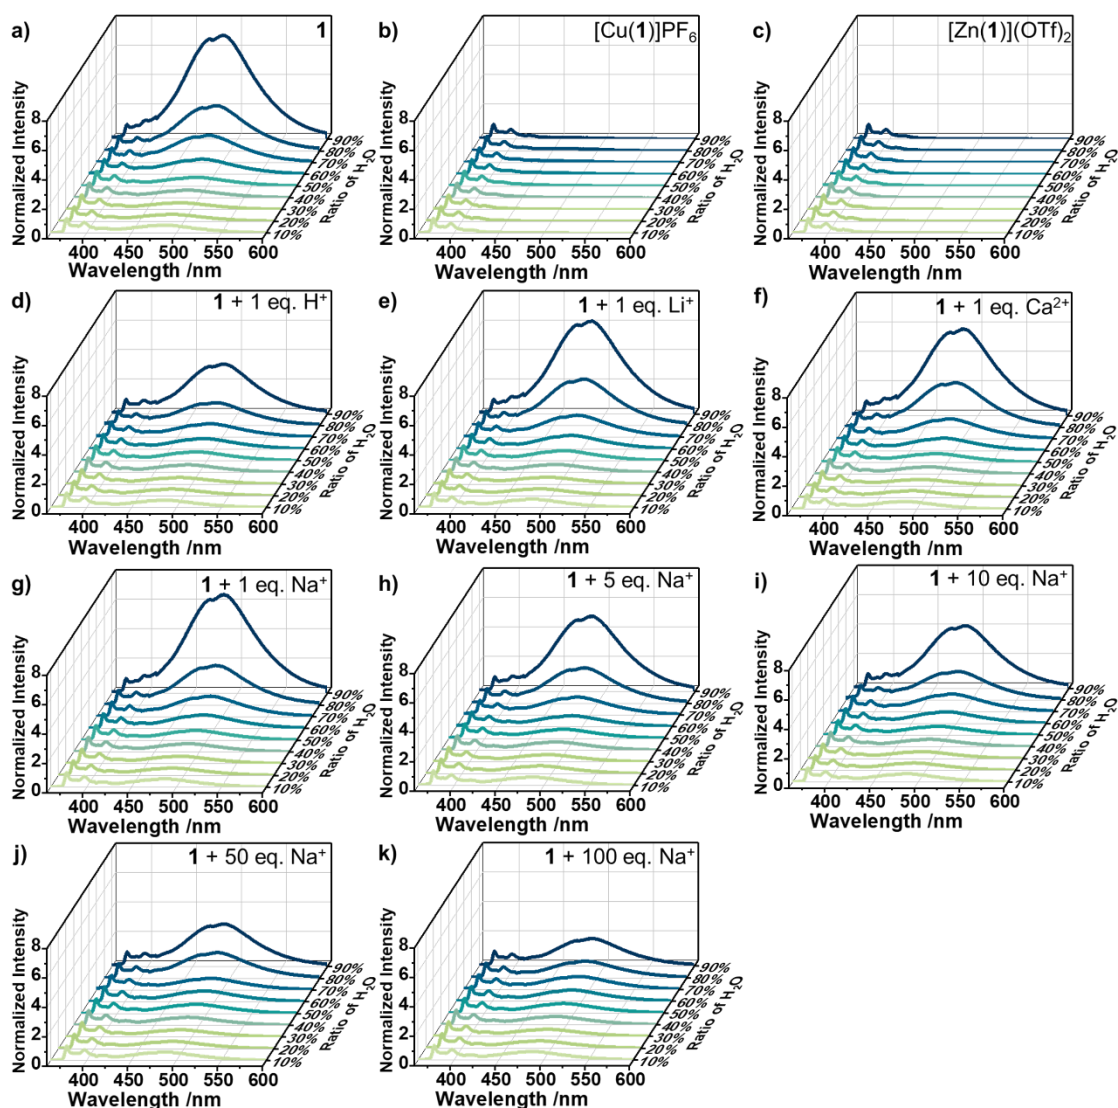

**Fig. S8.** Normalized fluorescent spectra of a) **1**; b)  $[\text{Cu}(\mathbf{1})]\text{PF}_6$ ; c)  $[\text{Zn}(\mathbf{1})](\text{OTf})_2$ ; d) **1** + 1 eq.  $\text{CF}_3\text{COOH}$ ; e) **1** + 1 eq. of  $\text{Li}^+$ ; f) **1** + 1 eq. of  $\text{Ca}^{2+}$ ; g) **1** + 1 eq. of  $\text{Na}^+$ ; h) **1** + 5 eq. of  $\text{Na}^+$ ; i) **1** + 10 eq. of  $\text{Na}^+$ ; j) **1** + 50 eq. of  $\text{Na}^+$ ; k) **1** + 100 eq. of  $\text{Na}^+$  in different percentages of  $\text{H}_2\text{O}$  in DMSO (v/v, 10% to 90%) at 298 K.

Association constants and stoichiometry of binding of **1** to H<sup>+</sup>, Li<sup>+</sup>, Na<sup>+</sup> and Ca<sup>2+</sup> were determined by fluorescent titration and Job's Plots respectively. All the measurements were conducted by using solutions of **1** in 97.5% (v/v) H<sub>2</sub>O/DMSO at 298 K at a final concentration of 25 μM. Stock solutions of 25 mM trifluoroacetic acid, LiCl, NaCl and CaCl<sub>2</sub> were prepared using a solution of 25 μM of **1** in 97.5% (v/v) H<sub>2</sub>O/DMSO.

The titration involved sequential additions of the guests using Eppendorf pipettes to a 1.000 mL aliquot of 25 μM of **1** in 97.5% (v/v) H<sub>2</sub>O/DMSO in a quartz cuvette. The solution were mixed well with a plastic disposable pipette prior to the collection of emission spectra. Emission spectra were collected from 360 nm to 600 nm.

Association constant ( $K_a$ ) was obtained by nonlinear curve-fitting using the following equation in which  $I$  is the normalized emission intensity at 485 nm in each measurement;  $I_0$  is the normalized emission intensity of **1** in the absence of cation;  $[H]_0$  is the initial concentration of **1** (25 μM); and  $[G]$  is the equilibrium concentration of the cation guest. Fitting was performed using Origin 2018.

$$I = I_0 + \frac{I_c - I_0}{2 \times [H]_0} \times \left[ \left( [H]_0 + [G] + \frac{1}{K_a} \right) - \sqrt{\left( [H]_0 + [G] + \frac{1}{K_a} \right)^2 - 4 \times [H]_0 \times [G]} \right]$$

Due to the presence of multiple basic nitrogen sites in **1**, acid-base equilibrium involving **1** would be highly complex and association of **1** with H<sup>+</sup> may not be reliably obtained from fluorescence titration with acid. It has been reported that phenanthroline-based catenane has a pK<sub>a</sub> value of ~8.7,<sup>2</sup> which may be comparable to the secondary and tertiary aliphatic amines in **1**. Photophysical properties of the pyrene may also be sensitive to the protonation state of the nearby triazole.

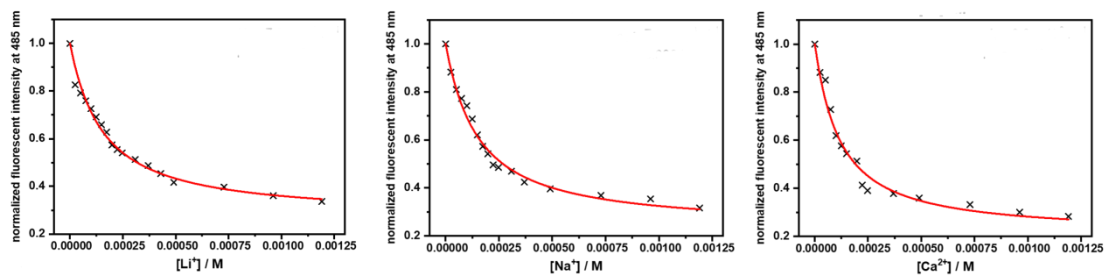

**Fig. S9.** Non-linear curve-fitting for the titration of a)  $\text{Li}^+$ ; b)  $\text{Na}^+$ ; and c)  $\text{Ca}^{2+}$  to **1**.

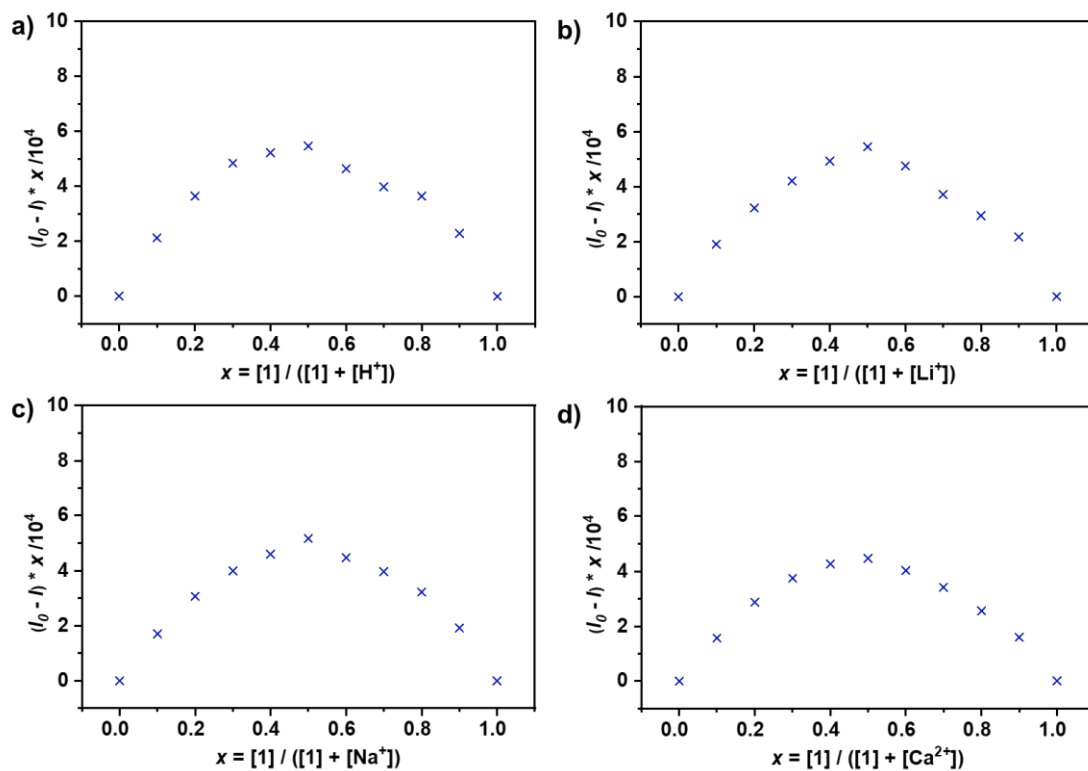

**Fig. S10.** Job's Plots for the binding of **1** with a)  $\text{H}^+$ ; b)  $\text{Li}^+$ ; c)  $\text{Na}^+$ ; d)  $\text{Ca}^{2+}$ .

### 3. Molecular dynamics simulations

Structural dynamics of **1**, [Zn(**1**)]<sup>2+</sup> and [1·H]<sup>+</sup> were simulated using GROMACS (Version 2020.2) with a CHARMM27 force field.<sup>3,4</sup> Molecular structures were converted into Tripos molecule structure format (MOL2) using VEGA ZZ (Version 3.2.1.33).<sup>5</sup> In SwissParam module,<sup>6</sup> the Van der Waals parameters were extracted from the closest atom type in CHARMM22,<sup>7</sup> while the atomic charges were determined from Merck Molecular ForceField (MMFF).<sup>8-12</sup> Catenane **1** and its Zn<sup>2+</sup> complex were first placed in the centre of a 1 x 10<sup>6</sup> Å<sup>3</sup> box (100 Å x 100 Å x 100 Å) and solvated with approximately 32,000 TIP3P water molecules or 6,800 SwissParam parameterized DMSO molecules with a minimum solvent depth of 30 Å from the edge. To neutralize the net charge on [Zn(**1**)]<sup>2+</sup> and [1·H]<sup>+</sup>, two or one solvent molecules were replaced by the same number of Cl<sup>-</sup> counterions respectively with Van der Waals parameters taken from Ujaque's and Halgren's works.<sup>13,14</sup>

Simulations were carried out using the particle mesh Ewald technique (PME) with periodic boundary and a 12 Å nonbonded cutoff.<sup>15</sup> Bondings in the molecule were constrained with an LINCS algorithm with a time step of 2.5 fs.<sup>16</sup> The system was first pre-equilibrated with 50,000 steps until its maximum force was below 1000.0 kJ/mol/nm, and then equilibrated using NVT at 298 K by coupling all atoms to a Berendsen-thermostat with a time constant of 0.1 ps and a simulation trajectory of 2 ns. With NPT MD, temperature of the system was maintained at 298 K with Berendsen weak-coupling algorithm (time constant = 0.1 ps), while the pressure was kept at 1.0 bar under Parrinello–Rahman Lagrangian (time constant = 2.0 ps) for 2 ns. Isothermal compressibilities of water and DMSO were set at 4.50 x 10<sup>-5</sup> bar<sup>-1</sup> and 5.0 x 10<sup>-5</sup> bar<sup>-1</sup> respectively.<sup>17</sup> The pressure and temperature were kept the same under NPT ensemble and the simulation was allowed to run for a further 50 ns, while snapshots were saved every 5 ps to examine the reproducibility of key events and verify conformational changes. Dihedral angle between the two phenanthroline planes ( $\alpha$ ), and distances between the centroids of the two phenanthrolines ( $d$ ) and the pyrenes were measured.

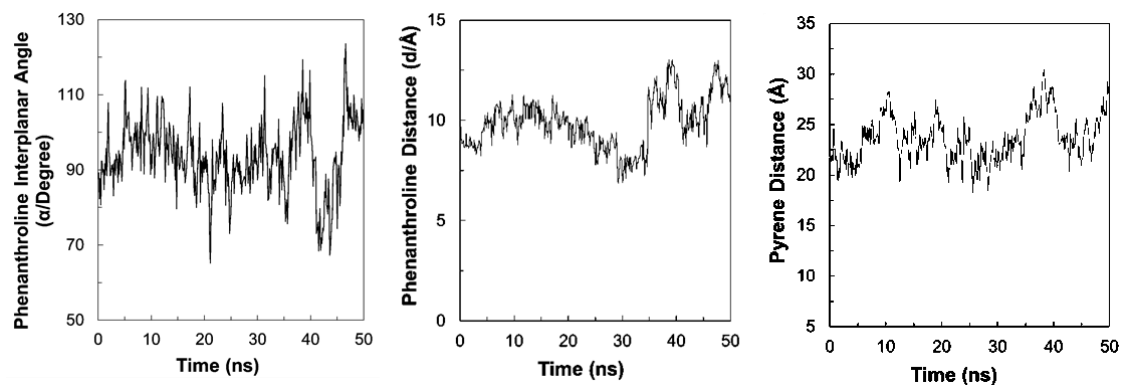

**Fig. S11.** Evolution of  $\alpha$  (left),  $d$  (middle) and inter-pyrene distance (right) of **1** in DMSO.

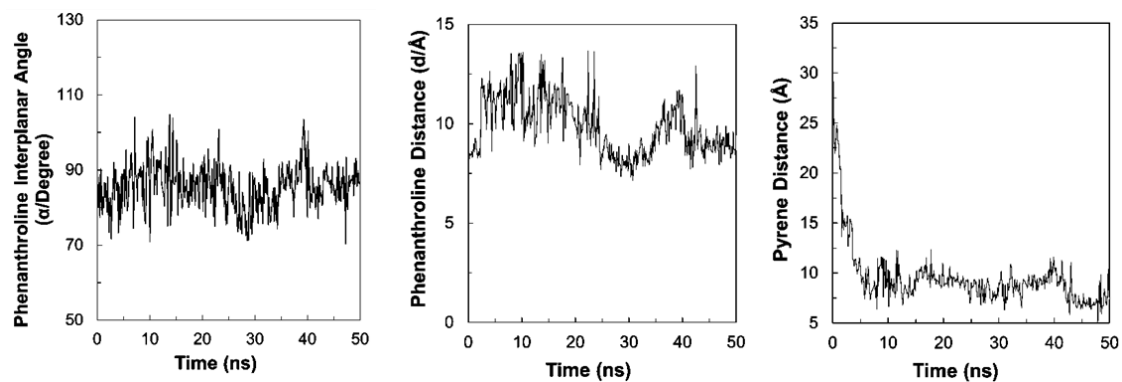

**Fig. S12.** Evolution of  $\alpha$  (left),  $d$  (middle) and inter-pyrene distance (right) of **1** in water.

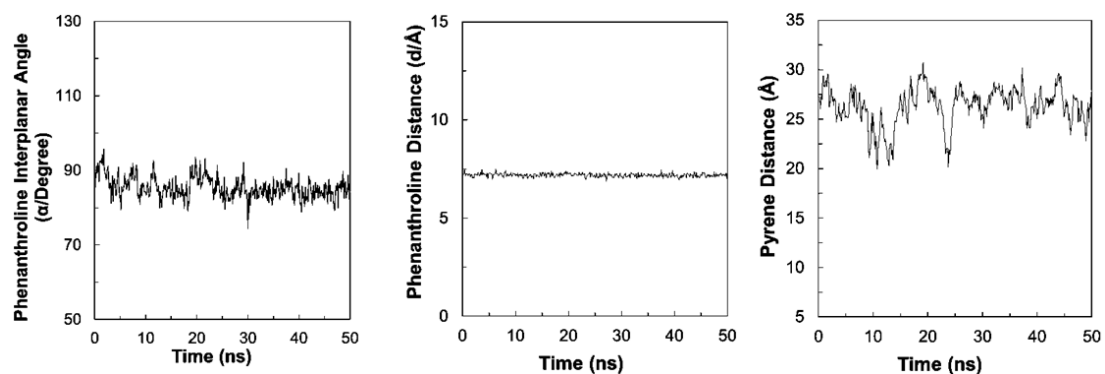

**Fig. S13.** Evolution of  $\alpha$  (left),  $d$  (middle) and inter-pyrene distance (right) of  $[\text{Zn}(\mathbf{1})]^{2+}$  in DMSO.



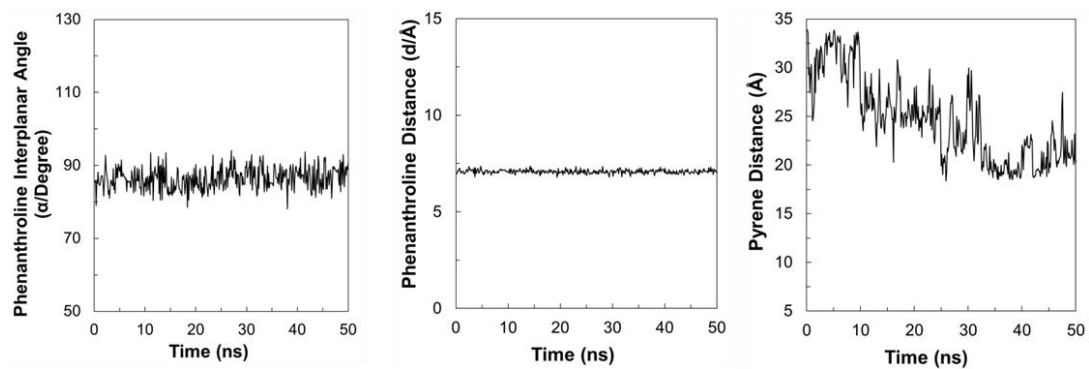

**Fig. S14.** Evolution of  $\alpha$  (left),  $d$  (middle) and inter-pyrene distance (right) of  $[\text{Zn}(\mathbf{1})]^{2+}$  in water.

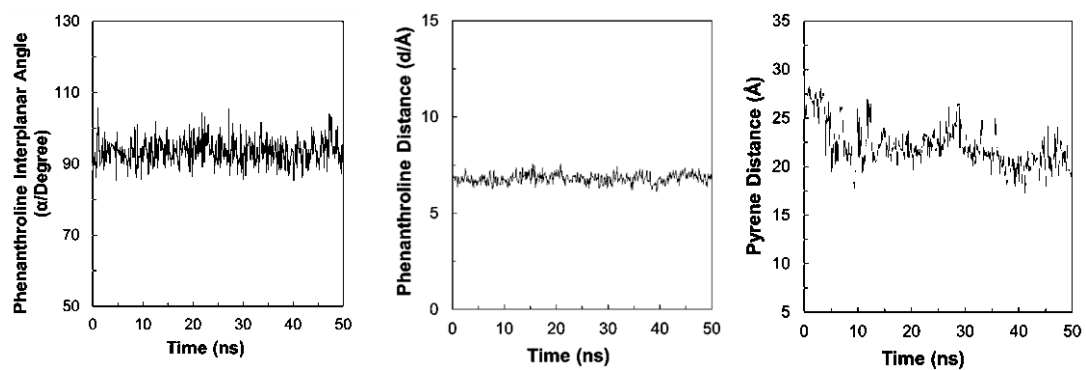

**Fig. S15.** Evolution  $\alpha$  (left),  $d$  (middle) and inter-pyrene distance (right) of  $[\mathbf{1}\cdot\text{H}]^+$  in water.

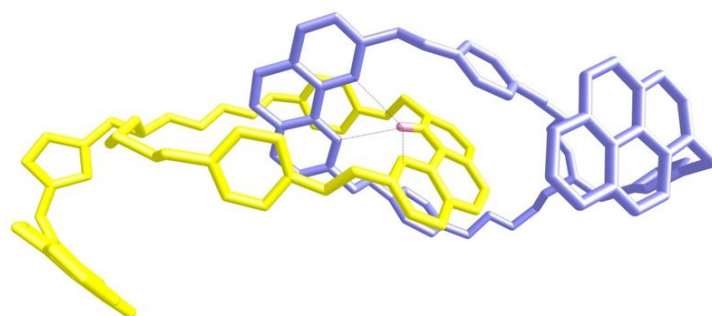

**Fig. S16.** A representative structure of  $[\mathbf{1}\cdot\text{H}]^+$  obtained using MD simulations in water.

**Table S1.** Cartesian coordinates of **1** in DMSO obtained using MD simulations. Cartesian coordinates of solvent molecules and hydrogen atoms are excluded.

| Atom Number | Atom Type | X Coordinate | Y Coordinate | Z Coordinate |
|-------------|-----------|--------------|--------------|--------------|
| 1           | C         | 30.07        | 23.23        | 36.88        |
| 2           | C1        | 30.84        | 24.23        | 37.43        |
| 3           | C2        | 30.43        | 25.59        | 37.33        |
| 4           | C3        | 29.21        | 25.95        | 36.74        |
| 5           | C4        | 28.39        | 24.93        | 36.16        |
| 6           | C5        | 28.84        | 23.60        | 36.26        |
| 7           | N         | 27.22        | 25.28        | 35.51        |
| 8           | C6        | 26.49        | 24.23        | 35.02        |
| 9           | C7        | 26.86        | 22.95        | 35.29        |
| 10          | C8        | 28.03        | 22.55        | 35.86        |
| 11          | C9        | 31.29        | 26.45        | 38.03        |
| 12          | C10       | 30.86        | 27.76        | 38.11        |
| 13          | C11       | 29.70        | 28.18        | 37.50        |
| 14          | N1        | 28.94        | 27.32        | 36.79        |
| 15          | C14       | 24.48        | 24.59        | 32.00        |
| 16          | C15       | 24.84        | 24.26        | 30.69        |
| 17          | C16       | 24.21        | 24.87        | 29.57        |
| 18          | C17       | 23.28        | 25.88        | 29.80        |
| 19          | C18       | 22.82        | 26.10        | 31.10        |
| 20          | C19       | 23.40        | 25.54        | 32.24        |
| 21          | C22       | 19.10        | 29.30        | 34.92        |
| 22          | C23       | 20.13        | 30.20        | 34.49        |
| 23          | C24       | 21.36        | 29.77        | 34.16        |
| 24          | C25       | 21.84        | 28.46        | 34.52        |
| 25          | C26       | 20.80        | 27.64        | 35.09        |
| 26          | C27       | 19.42        | 28.04        | 35.29        |
| 27          | N4        | 21.09        | 26.37        | 35.41        |
| 28          | C28       | 20.21        | 25.48        | 35.97        |
| 29          | C29       | 18.85        | 25.81        | 36.04        |
| 30          | C30       | 18.47        | 27.12        | 35.73        |
| 31          | C31       | 22.28        | 30.71        | 33.65        |
| 32          | C32       | 23.62        | 30.31        | 33.32        |
| 33          | C33       | 24.03        | 29.16        | 33.85        |
| 34          | N5        | 23.20        | 28.17        | 34.33        |
| 35          | C35       | 20.60        | 22.46        | 34.85        |
| 36          | C36       | 26.96        | 27.93        | 31.98        |
| 37          | C37       | 20.41        | 21.05        | 34.80        |
| 38          | C38       | 21.04        | 20.28        | 33.79        |
| 39          | C39       | 21.82        | 20.88        | 32.86        |
| 40          | C40       | 22.10        | 22.26        | 32.96        |
| 41          | C41       | 21.43        | 23.09        | 33.91        |
| 42          | C42       | 28.08        | 27.63        | 32.74        |
| 43          | C43       | 28.91        | 26.62        | 32.36        |
| 44          | C44       | 28.81        | 26.11        | 31.02        |
| 45          | C45       | 27.89        | 26.54        | 30.19        |
| 46          | C46       | 26.89        | 27.37        | 30.70        |
| 47          | C49       | 29.23        | 31.27        | 36.30        |
| 48          | C50       | 28.68        | 30.61        | 35.20        |
| 49          | C51       | 27.88        | 31.36        | 34.30        |
| 50          | C52       | 27.75        | 32.76        | 34.48        |
| 51          | C53       | 28.36        | 33.36        | 35.57        |

|     |      |       |       |       |
|-----|------|-------|-------|-------|
| 52  | C54  | 29.04 | 32.64 | 36.53 |
| 53  | C69  | 29.02 | 17.78 | 30.95 |
| 54  | C70  | 29.90 | 17.12 | 31.70 |
| 55  | N10  | 29.80 | 15.82 | 31.34 |
| 56  | N11  | 28.82 | 15.61 | 30.53 |
| 57  | N12  | 28.26 | 16.81 | 30.27 |
| 58  | C72  | 30.07 | 13.63 | 32.51 |
| 59  | C73  | 30.44 | 12.25 | 32.44 |
| 60  | C74  | 29.83 | 11.35 | 33.40 |
| 61  | C75  | 28.85 | 11.77 | 34.29 |
| 62  | C76  | 28.51 | 13.11 | 34.28 |
| 63  | C77  | 29.17 | 14.04 | 33.48 |
| 64  | C78  | 31.33 | 11.68 | 31.55 |
| 65  | C79  | 31.73 | 10.32 | 31.54 |
| 66  | C80  | 31.06 | 9.43  | 32.34 |
| 67  | C81  | 30.13 | 9.97  | 33.29 |
| 68  | C82  | 29.41 | 9.07  | 34.09 |
| 69  | C83  | 28.51 | 9.57  | 35.03 |
| 70  | C84  | 28.11 | 10.87 | 35.06 |
| 71  | C85  | 31.47 | 8.11  | 32.45 |
| 72  | C86  | 30.88 | 7.24  | 33.38 |
| 73  | C87  | 29.82 | 7.73  | 34.09 |
| 74  | C89  | 26.11 | 33.09 | 26.77 |
| 75  | C90  | 26.51 | 34.37 | 27.15 |
| 76  | N13  | 27.69 | 34.59 | 26.52 |
| 77  | N14  | 27.95 | 33.56 | 25.64 |
| 78  | N15  | 26.93 | 32.70 | 25.73 |
| 79  | C92  | 29.34 | 35.30 | 28.11 |
| 80  | C93  | 30.46 | 34.47 | 28.23 |
| 81  | C94  | 30.79 | 34.09 | 29.54 |
| 82  | C95  | 30.12 | 34.63 | 30.66 |
| 83  | C96  | 29.05 | 35.51 | 30.45 |
| 84  | C97  | 28.67 | 35.88 | 29.15 |
| 85  | C98  | 31.29 | 34.11 | 27.12 |
| 86  | C99  | 32.46 | 33.34 | 27.39 |
| 87  | C100 | 32.80 | 32.92 | 28.71 |
| 88  | C101 | 31.95 | 33.32 | 29.75 |
| 89  | C102 | 32.27 | 32.92 | 31.07 |
| 90  | C103 | 31.44 | 33.29 | 32.10 |
| 91  | C104 | 30.41 | 34.21 | 31.95 |
| 92  | C105 | 33.93 | 32.13 | 28.97 |
| 93  | C106 | 34.25 | 31.75 | 30.28 |
| 94  | C107 | 33.36 | 32.04 | 31.33 |
| 95  | C12  | 25.23 | 24.52 | 34.21 |
| 96  | O    | 25.23 | 23.86 | 32.93 |
| 97  | C13  | 29.20 | 29.54 | 37.89 |
| 98  | O1   | 29.98 | 30.60 | 37.28 |
| 99  | C20  | 22.74 | 26.50 | 28.54 |
| 100 | C21  | 27.20 | 33.50 | 33.39 |
| 101 | N2   | 23.33 | 27.84 | 28.37 |
| 102 | N3   | 25.74 | 33.28 | 33.22 |
| 103 | O2   | 19.88 | 23.06 | 35.94 |
| 104 | C34  | 25.52 | 28.76 | 33.78 |
| 105 | O3   | 26.00 | 28.78 | 32.42 |

|     |     |       |       |       |
|-----|-----|-------|-------|-------|
| 106 | C47 | 22.35 | 20.01 | 31.79 |
| 107 | C48 | 29.77 | 25.00 | 30.58 |
| 108 | N6  | 23.76 | 20.14 | 31.91 |
| 109 | N7  | 29.26 | 23.67 | 30.78 |
| 110 | C55 | 23.13 | 28.79 | 29.44 |
| 111 | C56 | 25.23 | 33.74 | 31.93 |
| 112 | C57 | 29.25 | 23.29 | 32.21 |
| 113 | C58 | 24.24 | 19.15 | 32.84 |
| 114 | C59 | 23.50 | 30.17 | 28.92 |
| 115 | C60 | 24.99 | 30.43 | 28.99 |
| 116 | N8  | 25.42 | 31.83 | 28.73 |
| 117 | C61 | 24.98 | 32.84 | 29.74 |
| 118 | C62 | 25.86 | 32.80 | 30.90 |
| 119 | C63 | 25.71 | 19.42 | 33.09 |
| 120 | C64 | 26.49 | 19.43 | 31.76 |
| 121 | N9  | 27.85 | 19.87 | 31.90 |
| 122 | C65 | 27.94 | 21.32 | 31.86 |
| 123 | C66 | 29.24 | 21.84 | 32.48 |
| 124 | C67 | 20.66 | 24.11 | 36.39 |
| 125 | C68 | 25.08 | 32.24 | 27.30 |
| 126 | C71 | 30.67 | 14.71 | 31.69 |
| 127 | C88 | 28.81 | 19.23 | 30.89 |
| 128 | C91 | 28.70 | 35.62 | 26.71 |

**Table S2.** Cartesian coordinates of **1** in water obtained using MD simulations. Cartesian coordinates of solvent molecules and hydrogen atoms are excluded.

| Atom Number | Atom Type | X Coordinate | Y Coordinate | Z Coordinate |
|-------------|-----------|--------------|--------------|--------------|
| 1           | C         | 23.85        | 34.24        | 82.41        |
| 2           | C1        | 25.15        | 34.08        | 82.02        |
| 3           | C2        | 26.13        | 34.87        | 82.61        |
| 4           | C3        | 25.88        | 35.83        | 83.62        |
| 5           | C4        | 24.50        | 36.03        | 83.92        |
| 6           | C5        | 23.44        | 35.18        | 83.34        |
| 7           | N         | 24.12        | 37.05        | 84.79        |
| 8           | C6        | 22.79        | 37.17        | 85.16        |
| 9           | C7        | 21.73        | 36.36        | 84.67        |
| 10          | C8        | 22.06        | 35.38        | 83.72        |
| 11          | C9        | 27.45        | 34.62        | 82.20        |
| 12          | C10       | 28.53        | 35.35        | 82.72        |
| 13          | C11       | 28.21        | 36.22        | 83.74        |
| 14          | N1        | 26.92        | 36.54        | 84.16        |
| 15          | C14       | 21.45        | 40.25        | 86.67        |
| 16          | C15       | 20.83        | 41.37        | 86.06        |
| 17          | C16       | 20.75        | 42.58        | 86.74        |
| 18          | C17       | 21.28        | 42.72        | 88.04        |
| 19          | C18       | 21.99        | 41.60        | 88.59        |
| 20          | C19       | 22.03        | 40.34        | 87.95        |
| 21          | C22       | 24.17        | 33.89        | 91.72        |
| 22          | C23       | 25.45        | 34.44        | 91.64        |
| 23          | C24       | 25.66        | 35.30        | 90.58        |
| 24          | C25       | 24.67        | 35.72        | 89.63        |
| 25          | C26       | 23.39        | 35.07        | 89.73        |

|    |     |       |       |       |
|----|-----|-------|-------|-------|
| 26 | C27 | 23.16 | 34.16 | 90.77 |
| 27 | N4  | 22.36 | 35.40 | 88.84 |
| 28 | C28 | 21.11 | 34.81 | 88.95 |
| 29 | C29 | 20.87 | 33.93 | 90.03 |
| 30 | C30 | 21.90 | 33.62 | 90.90 |
| 31 | C31 | 27.02 | 35.81 | 90.38 |
| 32 | C32 | 27.26 | 36.77 | 89.43 |
| 33 | C33 | 26.20 | 37.19 | 88.68 |
| 34 | N5  | 24.91 | 36.72 | 88.78 |
| 35 | C35 | 18.71 | 36.89 | 87.16 |
| 36 | C36 | 25.91 | 40.58 | 87.33 |
| 37 | C37 | 18.05 | 36.09 | 86.25 |
| 38 | C38 | 17.40 | 36.68 | 85.12 |
| 39 | C39 | 17.39 | 38.06 | 84.97 |
| 40 | C40 | 18.06 | 38.81 | 85.98 |
| 41 | C41 | 18.71 | 38.26 | 87.04 |
| 42 | C42 | 26.42 | 40.51 | 85.96 |
| 43 | C43 | 26.16 | 41.53 | 84.99 |
| 44 | C44 | 25.25 | 42.48 | 85.38 |
| 45 | C45 | 24.67 | 42.48 | 86.68 |
| 46 | C46 | 25.11 | 41.63 | 87.66 |
| 47 | C49 | 29.75 | 39.13 | 84.84 |
| 48 | C50 | 29.88 | 40.37 | 84.21 |
| 49 | C51 | 29.91 | 41.60 | 84.97 |
| 50 | C52 | 29.85 | 41.51 | 86.39 |
| 51 | C53 | 29.78 | 40.27 | 86.91 |
| 52 | C54 | 29.67 | 39.08 | 86.22 |
| 53 | C69 | 23.97 | 38.66 | 80.89 |
| 54 | C70 | 25.26 | 38.96 | 81.34 |
| 55 | N10 | 26.06 | 38.83 | 80.26 |
| 56 | N11 | 25.35 | 38.38 | 79.18 |
| 57 | N12 | 24.04 | 38.38 | 79.53 |
| 58 | C72 | 28.29 | 39.97 | 80.14 |
| 59 | C73 | 29.67 | 39.96 | 79.98 |
| 60 | C74 | 30.45 | 41.10 | 79.67 |
| 61 | C75 | 29.79 | 42.37 | 79.60 |
| 62 | C76 | 28.39 | 42.41 | 79.94 |
| 63 | C77 | 27.66 | 41.23 | 80.27 |
| 64 | C78 | 30.41 | 38.74 | 79.98 |
| 65 | C79 | 31.80 | 38.63 | 79.89 |
| 66 | C80 | 32.56 | 39.84 | 79.79 |
| 67 | C81 | 31.86 | 41.04 | 79.54 |
| 68 | C82 | 32.59 | 42.29 | 79.35 |
| 69 | C83 | 31.92 | 43.49 | 79.28 |
| 70 | C84 | 30.52 | 43.50 | 79.25 |
| 71 | C85 | 33.96 | 39.76 | 79.75 |
| 72 | C86 | 34.63 | 40.94 | 79.53 |
| 73 | C87 | 33.99 | 42.21 | 79.38 |
| 74 | C89 | 27.62 | 48.67 | 88.47 |
| 75 | C90 | 28.97 | 48.63 | 88.71 |
| 76 | N13 | 29.43 | 49.75 | 88.08 |
| 77 | N14 | 28.41 | 50.46 | 87.52 |
| 78 | N15 | 27.24 | 49.83 | 87.77 |
| 79 | C92 | 31.67 | 49.01 | 87.46 |

|     |      |       |       |       |
|-----|------|-------|-------|-------|
| 80  | C93  | 31.19 | 48.19 | 86.40 |
| 81  | C94  | 31.78 | 46.91 | 86.22 |
| 82  | C95  | 32.82 | 46.55 | 87.07 |
| 83  | C96  | 33.27 | 47.35 | 88.19 |
| 84  | C97  | 32.68 | 48.59 | 88.36 |
| 85  | C98  | 30.19 | 48.59 | 85.43 |
| 86  | C99  | 29.83 | 47.77 | 84.30 |
| 87  | C100 | 30.49 | 46.54 | 84.18 |
| 88  | C101 | 31.40 | 46.08 | 85.15 |
| 89  | C102 | 32.09 | 44.85 | 84.98 |
| 90  | C103 | 33.00 | 44.43 | 85.91 |
| 91  | C104 | 33.35 | 45.30 | 86.99 |
| 92  | C105 | 30.21 | 45.69 | 83.14 |
| 93  | C106 | 30.87 | 44.49 | 82.91 |
| 94  | C107 | 31.84 | 44.10 | 83.84 |
| 95  | C12  | 22.62 | 38.23 | 86.18 |
| 96  | O    | 21.64 | 39.23 | 85.72 |
| 97  | C13  | 29.33 | 36.80 | 84.55 |
| 98  | O1   | 29.78 | 38.05 | 84.01 |
| 99  | C20  | 21.31 | 44.01 | 88.80 |
| 100 | C21  | 30.11 | 42.75 | 87.22 |
| 101 | N2   | 22.39 | 44.81 | 88.24 |
| 102 | N3   | 28.88 | 43.41 | 87.50 |
| 103 | O2   | 19.33 | 36.43 | 88.27 |
| 104 | C34  | 26.44 | 38.29 | 87.69 |
| 105 | O3   | 26.27 | 39.54 | 88.29 |
| 106 | C47  | 16.72 | 38.75 | 83.82 |
| 107 | C48  | 24.86 | 43.56 | 84.47 |
| 108 | N6   | 17.69 | 39.47 | 82.99 |
| 109 | N7   | 24.20 | 43.22 | 83.22 |
| 110 | C55  | 22.59 | 46.04 | 89.08 |
| 111 | C56  | 29.12 | 44.33 | 88.62 |
| 112 | C57  | 22.86 | 42.95 | 83.54 |
| 113 | C58  | 18.36 | 38.47 | 82.09 |
| 114 | C59  | 23.75 | 46.87 | 88.61 |
| 115 | C60  | 25.03 | 46.00 | 88.59 |
| 116 | N8   | 26.20 | 46.70 | 88.11 |
| 117 | C61  | 27.31 | 45.77 | 87.75 |
| 118 | C62  | 27.86 | 45.00 | 88.94 |
| 119 | C63  | 19.54 | 39.07 | 81.36 |
| 120 | C64  | 20.68 | 39.40 | 82.41 |
| 121 | N9   | 21.93 | 39.79 | 81.72 |
| 122 | C65  | 22.62 | 40.67 | 82.67 |
| 123 | C66  | 22.13 | 42.06 | 82.57 |
| 124 | C67  | 20.02 | 35.17 | 87.95 |
| 125 | C68  | 26.61 | 47.74 | 89.12 |
| 126 | C71  | 27.52 | 38.67 | 80.36 |
| 127 | C88  | 22.69 | 38.50 | 81.64 |
| 128 | C91  | 30.78 | 50.18 | 87.88 |

---

**Table S3.** Cartesian coordinates of  $[\text{Zn}(\mathbf{1})]^{2+}$  in DMSO obtained using MD simulations. Cartesian coordinates of solvent molecules and hydrogen atoms are excluded.

| Atom Number | Atom Type | X Coordinate | Y Coordinate | Z Coordinate |
|-------------|-----------|--------------|--------------|--------------|
| 1           | C         | 31.98        | 24.73        | 34.28        |
| 2           | C1        | 33.12        | 25.48        | 34.43        |
| 3           | C2        | 33.26        | 26.65        | 33.64        |
| 4           | C3        | 32.27        | 26.99        | 32.63        |
| 5           | C4        | 31.19        | 26.10        | 32.49        |
| 6           | C5        | 30.97        | 25.02        | 33.38        |
| 7           | N         | 30.24        | 26.29        | 31.47        |
| 8           | C6        | 29.08        | 25.54        | 31.48        |
| 9           | C7        | 28.87        | 24.49        | 32.36        |
| 10          | C8        | 29.85        | 24.17        | 33.35        |
| 11          | C9        | 34.31        | 27.50        | 33.95        |
| 12          | C10       | 34.32        | 28.75        | 33.24        |
| 13          | C11       | 33.40        | 29.00        | 32.19        |
| 14          | N1        | 32.40        | 28.13        | 31.87        |
| 15          | C14       | 26.26        | 27.59        | 30.40        |
| 16          | C15       | 25.96        | 27.36        | 29.02        |
| 17          | C16       | 25.20        | 28.30        | 28.31        |
| 18          | C17       | 24.77        | 29.46        | 29.05        |
| 19          | C18       | 25.09        | 29.60        | 30.33        |
| 20          | C19       | 25.78        | 28.66        | 31.04        |
| 21          | C22       | 28.32        | 31.12        | 27.64        |
| 22          | C23       | 28.47        | 30.27        | 26.58        |
| 23          | C24       | 29.06        | 29.01        | 26.81        |
| 24          | C25       | 29.36        | 28.58        | 28.17        |
| 25          | C26       | 29.13        | 29.47        | 29.27        |
| 26          | C27       | 28.58        | 30.75        | 28.94        |
| 27          | N4        | 29.52        | 29.16        | 30.53        |
| 28          | C28       | 29.12        | 30.00        | 31.55        |
| 29          | C29       | 28.48        | 31.21        | 31.25        |
| 30          | C30       | 28.30        | 31.62        | 29.99        |
| 31          | C31       | 29.31        | 28.12        | 25.70        |
| 32          | C32       | 29.80        | 26.87        | 25.98        |
| 33          | C33       | 29.98        | 26.44        | 27.31        |
| 34          | N5        | 29.86        | 27.27        | 28.35        |
| 35          | C35       | 28.46        | 27.69        | 34.47        |
| 36          | C36       | 30.41        | 23.12        | 28.84        |
| 37          | C37       | 29.54        | 27.72        | 35.33        |
| 38          | C38       | 29.69        | 26.74        | 36.31        |
| 39          | C39       | 28.77        | 25.68        | 36.40        |
| 40          | C40       | 27.69        | 25.71        | 35.55        |
| 41          | C41       | 27.47        | 26.68        | 34.64        |
| 42          | C42       | 30.94        | 22.62        | 30.03        |
| 43          | C43       | 30.83        | 21.28        | 30.36        |
| 44          | C44       | 29.94        | 20.49        | 29.55        |
| 45          | C45       | 29.30        | 21.02        | 28.44        |
| 46          | C46       | 29.54        | 22.39        | 28.01        |
| 47          | C49       | 32.03        | 32.39        | 31.75        |
| 48          | C50       | 31.06        | 33.04        | 32.55        |
| 49          | C51       | 30.54        | 34.24        | 32.13        |
| 50          | C52       | 31.02        | 34.82        | 30.94        |

|     |      |       |       |       |
|-----|------|-------|-------|-------|
| 51  | C53  | 31.95 | 34.14 | 30.17 |
| 52  | C54  | 32.51 | 32.92 | 30.58 |
| 53  | C69  | 24.65 | 20.05 | 34.17 |
| 54  | C70  | 24.46 | 18.88 | 34.85 |
| 55  | N10  | 23.44 | 18.23 | 34.27 |
| 56  | N11  | 22.97 | 18.99 | 33.22 |
| 57  | N12  | 23.68 | 20.09 | 33.16 |
| 58  | C72  | 22.47 | 15.93 | 34.14 |
| 59  | C73  | 21.50 | 15.70 | 33.18 |
| 60  | C74  | 21.54 | 14.57 | 32.36 |
| 61  | C75  | 22.54 | 13.56 | 32.62 |
| 62  | C76  | 23.57 | 13.81 | 33.55 |
| 63  | C77  | 23.46 | 15.02 | 34.26 |
| 64  | C78  | 20.45 | 16.62 | 32.93 |
| 65  | C79  | 19.38 | 16.35 | 32.05 |
| 66  | C80  | 19.40 | 15.17 | 31.38 |
| 67  | C81  | 20.48 | 14.27 | 31.49 |
| 68  | C82  | 20.40 | 13.05 | 30.78 |
| 69  | C83  | 21.47 | 12.10 | 31.05 |
| 70  | C84  | 22.47 | 12.36 | 31.93 |
| 71  | C85  | 18.33 | 14.84 | 30.56 |
| 72  | C86  | 18.38 | 13.72 | 29.80 |
| 73  | C87  | 19.44 | 12.81 | 29.88 |
| 74  | C89  | 23.94 | 38.13 | 29.23 |
| 75  | C90  | 24.47 | 39.07 | 30.06 |
| 76  | N13  | 24.60 | 40.17 | 29.26 |
| 77  | N14  | 23.82 | 40.02 | 28.16 |
| 78  | N15  | 23.49 | 38.80 | 28.08 |
| 79  | C92  | 26.57 | 41.24 | 30.16 |
| 80  | C93  | 27.57 | 40.71 | 29.33 |
| 81  | C94  | 28.78 | 40.37 | 29.89 |
| 82  | C95  | 29.02 | 40.52 | 31.27 |
| 83  | C96  | 28.02 | 41.12 | 32.06 |
| 84  | C97  | 26.78 | 41.43 | 31.48 |
| 85  | C98  | 27.33 | 40.38 | 27.91 |
| 86  | C99  | 28.35 | 40.01 | 27.12 |
| 87  | C100 | 29.61 | 39.80 | 27.70 |
| 88  | C101 | 29.80 | 39.90 | 29.06 |
| 89  | C102 | 31.04 | 39.48 | 29.65 |
| 90  | C103 | 31.21 | 39.50 | 31.06 |
| 91  | C104 | 30.21 | 40.10 | 31.88 |
| 92  | C105 | 30.56 | 39.21 | 26.88 |
| 93  | C106 | 31.78 | 38.76 | 27.41 |
| 94  | C107 | 32.02 | 38.87 | 28.79 |
| 95  | C12  | 27.85 | 25.86 | 30.54 |
| 96  | O    | 26.99 | 26.77 | 31.25 |
| 97  | C13  | 33.31 | 30.37 | 31.63 |
| 98  | O1   | 32.27 | 31.11 | 32.22 |
| 99  | C20  | 23.75 | 30.42 | 28.51 |
| 100 | C21  | 30.42 | 36.02 | 30.31 |
| 101 | N2   | 24.12 | 31.86 | 28.79 |
| 102 | N3   | 29.29 | 35.55 | 29.52 |
| 103 | O2   | 28.15 | 28.65 | 33.40 |
| 104 | C34  | 30.40 | 24.99 | 27.41 |



|     |     |       |       |       |
|-----|-----|-------|-------|-------|
| 105 | O3  | 30.36 | 24.50 | 28.79 |
| 106 | C47 | 28.88 | 24.55 | 37.39 |
| 107 | C48 | 29.59 | 19.09 | 29.94 |
| 108 | N6  | 29.35 | 23.33 | 36.80 |
| 109 | N7  | 28.64 | 19.11 | 31.02 |
| 110 | C55 | 24.84 | 32.31 | 27.61 |
| 111 | C56 | 28.61 | 36.73 | 28.92 |
| 112 | C57 | 29.31 | 18.92 | 32.32 |
| 113 | C58 | 28.84 | 22.13 | 37.49 |
| 114 | C59 | 25.40 | 33.72 | 27.83 |
| 115 | C60 | 24.47 | 34.52 | 28.68 |
| 116 | N8  | 24.86 | 35.93 | 28.61 |
| 117 | C61 | 26.15 | 36.19 | 29.29 |
| 118 | C62 | 27.24 | 36.45 | 28.30 |
| 119 | C63 | 27.71 | 21.33 | 36.85 |
| 120 | C64 | 27.85 | 21.42 | 35.36 |
| 121 | N9  | 26.92 | 20.50 | 34.68 |
| 122 | C65 | 27.47 | 20.09 | 33.44 |
| 123 | C66 | 28.40 | 18.84 | 33.50 |
| 124 | C67 | 29.27 | 29.46 | 32.95 |
| 125 | C68 | 23.78 | 36.65 | 29.37 |
| 126 | C71 | 22.57 | 17.26 | 34.93 |
| 127 | C88 | 25.63 | 21.13 | 34.54 |
| 128 | C91 | 25.23 | 41.44 | 29.57 |
| 129 | Zn  | 31.28 | 27.70 | 30.01 |

**Table S4.** Cartesian coordinates of  $[\text{Zn}(\mathbf{1})]^{2+}$  in water obtained using MD simulations. Cartesian coordinates of solvent molecules and hydrogen atoms are excluded.

| Atom Number | Atom Type | X Coordinate | Y Coordinate | Z Coordinate |
|-------------|-----------|--------------|--------------|--------------|
| 1           | C         | 45.67        | 80.12        | -62.70       |
| 2           | C1        | 45.33        | 80.25        | -61.41       |
| 3           | C2        | 46.34        | 80.20        | -60.40       |
| 4           | C3        | 47.71        | 80.12        | -60.70       |
| 5           | C4        | 48.11        | 80.08        | -62.16       |
| 6           | C5        | 47.02        | 80.01        | -63.08       |
| 7           | N         | 49.37        | 80.08        | -62.60       |
| 8           | C6        | 49.58        | 79.90        | -63.94       |
| 9           | C7        | 48.58        | 79.80        | -64.89       |
| 10          | C8        | 47.25        | 79.84        | -64.47       |
| 11          | C9        | 45.91        | 80.20        | -59.11       |
| 12          | C10       | 46.88        | 80.11        | -58.12       |
| 13          | C11       | 48.25        | 79.98        | -58.36       |
| 14          | N1        | 48.70        | 80.11        | -59.69       |
| 15          | C14       | 53.00        | 78.75        | -63.98       |
| 16          | C15       | 53.80        | 79.91        | -64.28       |
| 17          | C16       | 55.23        | 79.96        | -64.02       |
| 18          | C17       | 55.74        | 78.88        | -63.26       |
| 19          | C18       | 54.88        | 77.74        | -62.97       |
| 20          | C19       | 53.55        | 77.68        | -63.33       |
| 21          | C22       | 54.65        | 79.21        | -57.81       |
| 22          | C23       | 54.57        | 80.55        | -57.40       |
| 23          | C24       | 53.50        | 81.36        | -57.66       |
| 24          | C25       | 52.45        | 80.92        | -58.51       |

|    |     |       |       |        |
|----|-----|-------|-------|--------|
| 25 | C26 | 52.53 | 79.55 | -59.01 |
| 26 | C27 | 53.62 | 78.68 | -58.59 |
| 27 | N4  | 51.46 | 79.01 | -59.86 |
| 28 | C28 | 51.55 | 77.64 | -60.22 |
| 29 | C29 | 52.57 | 76.82 | -59.76 |
| 30 | C30 | 53.61 | 77.35 | -59.02 |
| 31 | C31 | 53.39 | 82.64 | -57.07 |
| 32 | C32 | 52.18 | 83.31 | -57.21 |
| 33 | C33 | 51.20 | 82.83 | -58.03 |
| 34 | N5  | 51.31 | 81.64 | -58.74 |
| 35 | C35 | 48.02 | 76.77 | -60.76 |
| 36 | C36 | 47.86 | 83.54 | -56.82 |
| 37 | C37 | 46.98 | 76.92 | -59.85 |
| 38 | C38 | 45.64 | 76.93 | -60.27 |
| 39 | C39 | 45.41 | 76.71 | -61.67 |
| 40 | C40 | 46.48 | 76.68 | -62.59 |
| 41 | C41 | 47.79 | 76.59 | -62.11 |
| 42 | C42 | 47.13 | 83.27 | -55.67 |
| 43 | C43 | 45.75 | 83.22 | -55.67 |
| 44 | C44 | 45.06 | 83.49 | -56.86 |
| 45 | C45 | 45.76 | 84.00 | -57.99 |
| 46 | C46 | 47.14 | 84.03 | -57.94 |
| 47 | C49 | 50.32 | 77.59 | -56.32 |
| 48 | C50 | 50.57 | 76.22 | -56.58 |
| 49 | C51 | 51.65 | 75.54 | -55.98 |
| 50 | C52 | 52.57 | 76.28 | -55.20 |
| 51 | C53 | 52.33 | 77.65 | -54.96 |
| 52 | C54 | 51.25 | 78.27 | -55.52 |
| 53 | C69 | 39.15 | 77.72 | -59.39 |
| 54 | C70 | 39.84 | 76.94 | -58.50 |
| 55 | N10 | 39.19 | 75.73 | -58.46 |
| 56 | N11 | 38.05 | 75.84 | -59.15 |
| 57 | N12 | 37.93 | 77.05 | -59.71 |
| 58 | C72 | 40.99 | 74.07 | -58.55 |
| 59 | C73 | 41.20 | 73.73 | -59.91 |
| 60 | C74 | 42.51 | 73.38 | -60.35 |
| 61 | C75 | 43.55 | 73.30 | -59.42 |
| 62 | C76 | 43.30 | 73.64 | -58.08 |
| 63 | C77 | 42.05 | 74.05 | -57.67 |
| 64 | C78 | 40.16 | 73.92 | -60.82 |
| 65 | C79 | 40.35 | 73.58 | -62.20 |
| 66 | C80 | 41.59 | 73.17 | -62.66 |
| 67 | C81 | 42.62 | 73.03 | -61.74 |
| 68 | C82 | 43.85 | 72.57 | -62.18 |
| 69 | C83 | 44.96 | 72.59 | -61.30 |
| 70 | C84 | 44.83 | 73.06 | -59.99 |
| 71 | C85 | 41.72 | 72.79 | -64.00 |
| 72 | C86 | 42.94 | 72.16 | -64.41 |
| 73 | C87 | 44.03 | 72.16 | -63.49 |
| 74 | C89 | 58.58 | 79.26 | -55.13 |
| 75 | C90 | 57.43 | 79.67 | -54.42 |
| 76 | N13 | 57.84 | 79.64 | -53.11 |
| 77 | N14 | 59.09 | 79.24 | -53.02 |
| 78 | N15 | 59.57 | 79.03 | -54.23 |

|     |      |       |       |        |
|-----|------|-------|-------|--------|
| 79  | C92  | 55.71 | 79.99 | -52.00 |
| 80  | C93  | 54.96 | 81.08 | -52.52 |
| 81  | C94  | 53.52 | 81.03 | -52.47 |
| 82  | C95  | 52.84 | 79.86 | -51.99 |
| 83  | C96  | 53.64 | 78.73 | -51.65 |
| 84  | C97  | 55.03 | 78.83 | -51.57 |
| 85  | C98  | 55.58 | 82.18 | -53.08 |
| 86  | C99  | 54.73 | 83.26 | -53.50 |
| 87  | C100 | 53.38 | 83.20 | -53.52 |
| 88  | C101 | 52.72 | 82.04 | -53.07 |
| 89  | C102 | 51.32 | 81.92 | -52.97 |
| 90  | C103 | 50.71 | 80.82 | -52.50 |
| 91  | C104 | 51.47 | 79.79 | -52.01 |
| 92  | C105 | 52.55 | 84.24 | -54.05 |
| 93  | C106 | 51.17 | 84.11 | -54.04 |
| 94  | C107 | 50.57 | 82.96 | -53.52 |
| 95  | C12  | 51.01 | 79.94 | -64.41 |
| 96  | O    | 51.65 | 78.77 | -63.89 |
| 97  | C13  | 49.24 | 79.61 | -57.26 |
| 98  | O1   | 49.25 | 78.17 | -57.05 |
| 99  | C20  | 57.19 | 78.98 | -62.87 |
| 100 | C21  | 53.65 | 75.54 | -54.50 |
| 101 | N2   | 57.44 | 79.47 | -61.56 |
| 102 | N3   | 54.75 | 75.08 | -55.39 |
| 103 | O2   | 49.29 | 76.72 | -60.11 |
| 104 | C34  | 49.87 | 83.51 | -58.08 |
| 105 | O3   | 49.21 | 83.41 | -56.80 |
| 106 | C47  | 44.00 | 76.44 | -62.02 |
| 107 | C48  | 43.58 | 83.35 | -56.91 |
| 108 | N6   | 43.22 | 77.68 | -62.26 |
| 109 | N7   | 43.20 | 82.11 | -57.58 |
| 110 | C55  | 57.43 | 78.28 | -60.68 |
| 111 | C56  | 55.69 | 76.22 | -55.55 |
| 112 | C57  | 41.75 | 82.06 | -57.44 |
| 113 | C58  | 41.85 | 77.28 | -61.91 |
| 114 | C59  | 57.70 | 78.78 | -59.27 |
| 115 | C60  | 57.77 | 77.63 | -58.36 |
| 116 | N8   | 57.75 | 77.93 | -56.95 |
| 117 | C61  | 58.10 | 76.68 | -56.24 |
| 118 | C62  | 56.95 | 75.63 | -56.23 |
| 119 | C63  | 40.87 | 78.34 | -62.24 |
| 120 | C64  | 41.03 | 79.65 | -61.51 |
| 121 | N9   | 40.67 | 79.56 | -60.05 |
| 122 | C65  | 41.09 | 80.84 | -59.40 |
| 123 | C66  | 41.16 | 80.72 | -57.88 |
| 124 | C67  | 50.43 | 76.95 | -60.95 |
| 125 | C68  | 58.82 | 78.90 | -56.56 |
| 126 | C71  | 39.63 | 74.45 | -57.98 |
| 127 | C88  | 39.30 | 79.20 | -59.80 |
| 128 | C91  | 57.20 | 79.93 | -51.91 |
| 129 | Zn   | 50.53 | 80.77 | -60.68 |

---

**Table S5.** Cartesian coordinates of [1-H]<sup>+</sup> in water obtained using MD simulations. Cartesian coordinates of solvent molecules and hydrogen atoms are excluded.

| Atom Number | Atom Type | X Coordinate | Y Coordinate | Z Coordinate |
|-------------|-----------|--------------|--------------|--------------|
| 1           | C         | 29.99        | 25.42        | 24.36        |
| 2           | C1        | 28.74        | 25.36        | 24.96        |
| 3           | C2        | 27.79        | 26.30        | 24.69        |
| 4           | C3        | 28.03        | 27.37        | 23.80        |
| 5           | C4        | 29.37        | 27.55        | 23.30        |
| 6           | C5        | 30.31        | 26.50        | 23.56        |
| 7           | N         | 29.68        | 28.70        | 22.63        |
| 8           | C6        | 30.92        | 28.80        | 22.22        |
| 9           | C7        | 31.90        | 27.82        | 22.32        |
| 10          | C8        | 31.63        | 26.66        | 23.01        |
| 11          | C9        | 26.53        | 26.10        | 25.20        |
| 12          | C10       | 25.50        | 26.94        | 24.76        |
| 13          | C11       | 25.80        | 28.04        | 23.92        |
| 14          | N1        | 27.04        | 28.29        | 23.43        |
| 15          | C14       | 31.23        | 31.26        | 19.61        |
| 16          | C15       | 31.89        | 32.40        | 20.19        |
| 17          | C16       | 32.07        | 33.56        | 19.39        |
| 18          | C17       | 31.74        | 33.54        | 18.08        |
| 19          | C18       | 31.08        | 32.42        | 17.44        |
| 20          | C19       | 30.89        | 31.30        | 18.23        |
| 21          | C22       | 29.26        | 34.52        | 21.90        |
| 22          | C23       | 29.69        | 34.53        | 23.18        |
| 23          | C24       | 29.41        | 33.50        | 24.12        |
| 24          | C25       | 28.78        | 32.33        | 23.63        |
| 25          | C26       | 28.34        | 32.33        | 22.28        |
| 26          | C27       | 28.50        | 33.42        | 21.41        |
| 27          | N4        | 27.77        | 31.19        | 21.79        |
| 28          | C28       | 27.27        | 31.09        | 20.49        |
| 29          | C29       | 27.40        | 32.21        | 19.64        |
| 30          | C30       | 28.05        | 33.41        | 20.12        |
| 31          | C31       | 29.98        | 33.50        | 25.38        |
| 32          | C32       | 29.78        | 32.46        | 26.24        |
| 33          | C33       | 29.11        | 31.30        | 25.78        |
| 34          | N5        | 28.62        | 31.21        | 24.52        |
| 35          | C35       | 27.43        | 27.57        | 20.00        |
| 36          | C36       | 29.96        | 28.19        | 27.53        |
| 37          | C37       | 26.14        | 27.07        | 20.31        |
| 38          | C38       | 26.10        | 25.71        | 20.73        |
| 39          | C39       | 27.20        | 24.92        | 20.71        |
| 40          | C40       | 28.44        | 25.41        | 20.31        |
| 41          | C41       | 28.58        | 26.77        | 20.08        |
| 42          | C42       | 28.71        | 27.64        | 27.93        |
| 43          | C43       | 28.72        | 26.40        | 28.53        |
| 44          | C44       | 29.91        | 25.74        | 28.71        |
| 45          | C45       | 31.18        | 26.30        | 28.35        |
| 46          | C46       | 31.20        | 27.49        | 27.69        |
| 47          | C49       | 24.41        | 31.13        | 23.17        |
| 48          | C50       | 23.84        | 31.09        | 21.86        |
| 49          | C51       | 23.90        | 32.25        | 21.13        |
| 50          | C52       | 24.35        | 33.43        | 21.77        |

|     |      |       |       |       |
|-----|------|-------|-------|-------|
| 51  | C53  | 24.89 | 33.41 | 23.02 |
| 52  | C54  | 24.89 | 32.27 | 23.69 |
| 53  | C69  | 25.61 | 18.91 | 27.44 |
| 54  | C70  | 25.28 | 19.21 | 28.76 |
| 55  | N10  | 25.19 | 18.01 | 29.38 |
| 56  | N11  | 25.42 | 17.01 | 28.50 |
| 57  | N12  | 25.72 | 17.53 | 27.31 |
| 58  | C72  | 23.69 | 16.79 | 31.08 |
| 59  | C73  | 22.49 | 17.22 | 31.66 |
| 60  | C74  | 21.43 | 16.24 | 31.89 |
| 61  | C75  | 21.59 | 14.88 | 31.54 |
| 62  | C76  | 22.78 | 14.56 | 30.83 |
| 63  | C77  | 23.85 | 15.45 | 30.70 |
| 64  | C78  | 22.22 | 18.59 | 31.99 |
| 65  | C79  | 20.99 | 19.02 | 32.59 |
| 66  | C80  | 20.06 | 18.04 | 32.98 |
| 67  | C81  | 20.20 | 16.64 | 32.53 |
| 68  | C82  | 19.23 | 15.73 | 32.91 |
| 69  | C83  | 19.46 | 14.40 | 32.61 |
| 70  | C84  | 20.55 | 14.00 | 31.90 |
| 71  | C85  | 18.89 | 18.40 | 33.66 |
| 72  | C86  | 18.04 | 17.40 | 34.04 |
| 73  | C87  | 18.12 | 16.11 | 33.63 |
| 74  | C89  | 27.26 | 41.30 | 19.32 |
| 75  | C90  | 27.25 | 41.98 | 20.52 |
| 76  | N13  | 25.92 | 42.32 | 20.65 |
| 77  | N14  | 25.29 | 42.02 | 19.51 |
| 78  | N15  | 26.12 | 41.55 | 18.64 |
| 79  | C92  | 24.66 | 41.37 | 22.45 |
| 80  | C93  | 25.48 | 40.53 | 23.28 |
| 81  | C94  | 24.98 | 39.27 | 23.63 |
| 82  | C95  | 23.69 | 38.88 | 23.19 |
| 83  | C96  | 22.90 | 39.78 | 22.45 |
| 84  | C97  | 23.43 | 40.96 | 22.05 |
| 85  | C98  | 26.70 | 40.94 | 23.84 |
| 86  | C99  | 27.52 | 40.16 | 24.61 |
| 87  | C100 | 27.15 | 38.80 | 24.76 |
| 88  | C101 | 25.86 | 38.41 | 24.29 |
| 89  | C102 | 25.37 | 37.10 | 24.54 |
| 90  | C103 | 24.11 | 36.68 | 24.15 |
| 91  | C104 | 23.28 | 37.56 | 23.44 |
| 92  | C105 | 27.99 | 37.84 | 25.28 |
| 93  | C106 | 27.52 | 36.56 | 25.50 |
| 94  | C107 | 26.22 | 36.19 | 25.22 |
| 95  | C12  | 31.41 | 30.07 | 21.65 |
| 96  | O    | 30.80 | 30.13 | 20.35 |
| 97  | C13  | 24.69 | 28.83 | 23.33 |
| 98  | O1   | 24.39 | 30.04 | 24.08 |
| 99  | C20  | 31.72 | 34.84 | 17.33 |
| 100 | C21  | 24.54 | 34.62 | 20.86 |
| 101 | N2   | 30.65 | 35.64 | 17.85 |
| 102 | N3   | 25.83 | 35.26 | 21.09 |
| 103 | H    | 27.73 | 30.41 | 22.44 |
| 104 | O2   | 27.65 | 28.87 | 19.52 |

|     |     |       |       |       |
|-----|-----|-------|-------|-------|
| 105 | C34 | 28.92 | 30.16 | 26.73 |
| 106 | O3  | 30.11 | 29.36 | 26.75 |
| 107 | C47 | 27.23 | 23.51 | 21.12 |
| 108 | C48 | 29.91 | 24.31 | 29.10 |
| 109 | N6  | 27.12 | 23.41 | 22.53 |
| 110 | N7  | 29.62 | 23.45 | 27.92 |
| 111 | C55 | 30.86 | 37.02 | 17.37 |
| 112 | C56 | 25.91 | 36.48 | 20.28 |
| 113 | C57 | 30.00 | 22.07 | 28.05 |
| 114 | C58 | 27.45 | 22.07 | 22.87 |
| 115 | C59 | 29.62 | 37.84 | 17.74 |
| 116 | C60 | 29.61 | 38.35 | 19.15 |
| 117 | N8  | 28.47 | 39.16 | 19.62 |
| 118 | C61 | 27.24 | 38.35 | 19.55 |
| 119 | C62 | 27.23 | 37.15 | 20.43 |
| 120 | C63 | 27.24 | 21.82 | 24.34 |
| 121 | C64 | 27.65 | 20.36 | 24.64 |
| 122 | N9  | 27.40 | 20.02 | 26.11 |
| 123 | C65 | 27.88 | 21.11 | 27.03 |
| 124 | C66 | 29.43 | 21.19 | 26.99 |
| 125 | C67 | 26.69 | 29.79 | 20.03 |
| 126 | C68 | 28.26 | 40.33 | 18.74 |
| 127 | C71 | 24.87 | 17.73 | 30.80 |
| 128 | C88 | 25.91 | 19.77 | 26.25 |
| 129 | C91 | 25.20 | 42.60 | 21.83 |

**Table S6.** Comparison of the H1–N(phenanthroline) distances in protonated [2]catenenes.

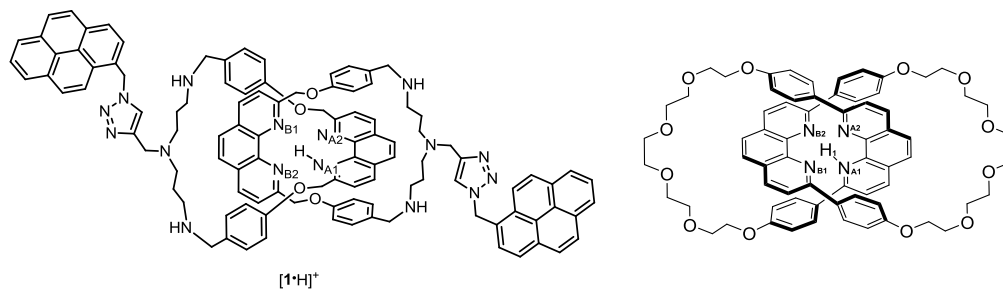

|                                 |      |                   |
|---------------------------------|------|-------------------|
| H <sub>1</sub> -N <sub>A1</sub> | 0.77 | 0.78 <sup>2</sup> |
| H <sub>1</sub> -N <sub>A2</sub> | 2.35 | 2.35 <sup>2</sup> |
| H <sub>1</sub> -N <sub>B1</sub> | 2.53 | 2.49 <sup>2</sup> |
| H <sub>1</sub> -N <sub>B2</sub> | 3.25 | 3.20 <sup>2</sup> |

## 4. NMR Spectra

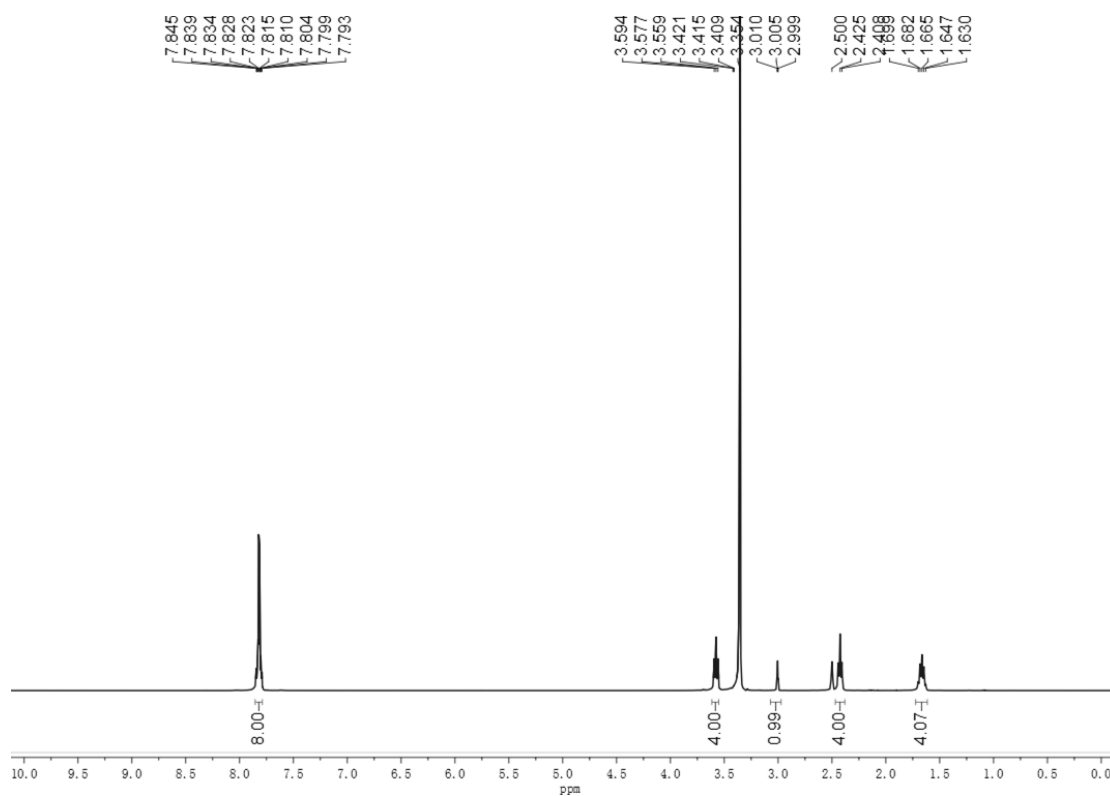

Fig. S17.  $^1\text{H}$  NMR (400 MHz,  $\text{DMSO-}d_6$ , 298 K) spectrum of **A-Pht**.

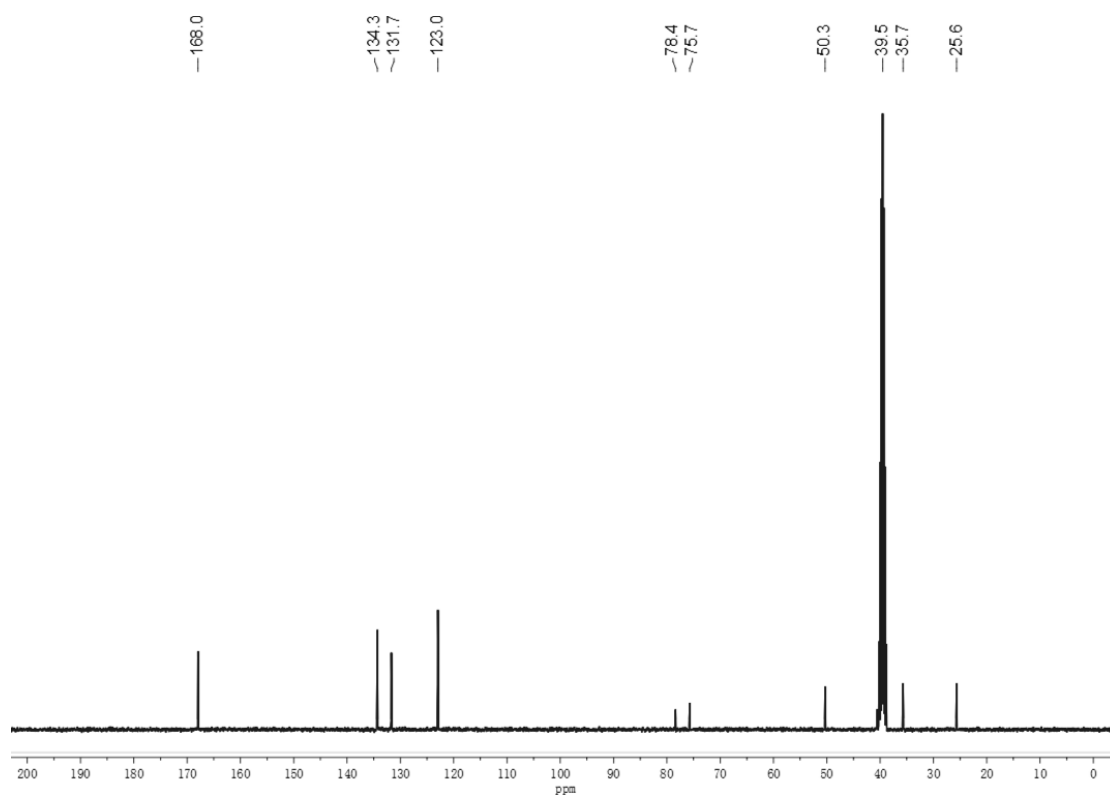

Fig. S18.  $^{13}\text{C}\{^1\text{H}\}$  NMR (100 MHz,  $\text{DMSO-}d_6$ , 298 K) spectrum of **A-Pht**.

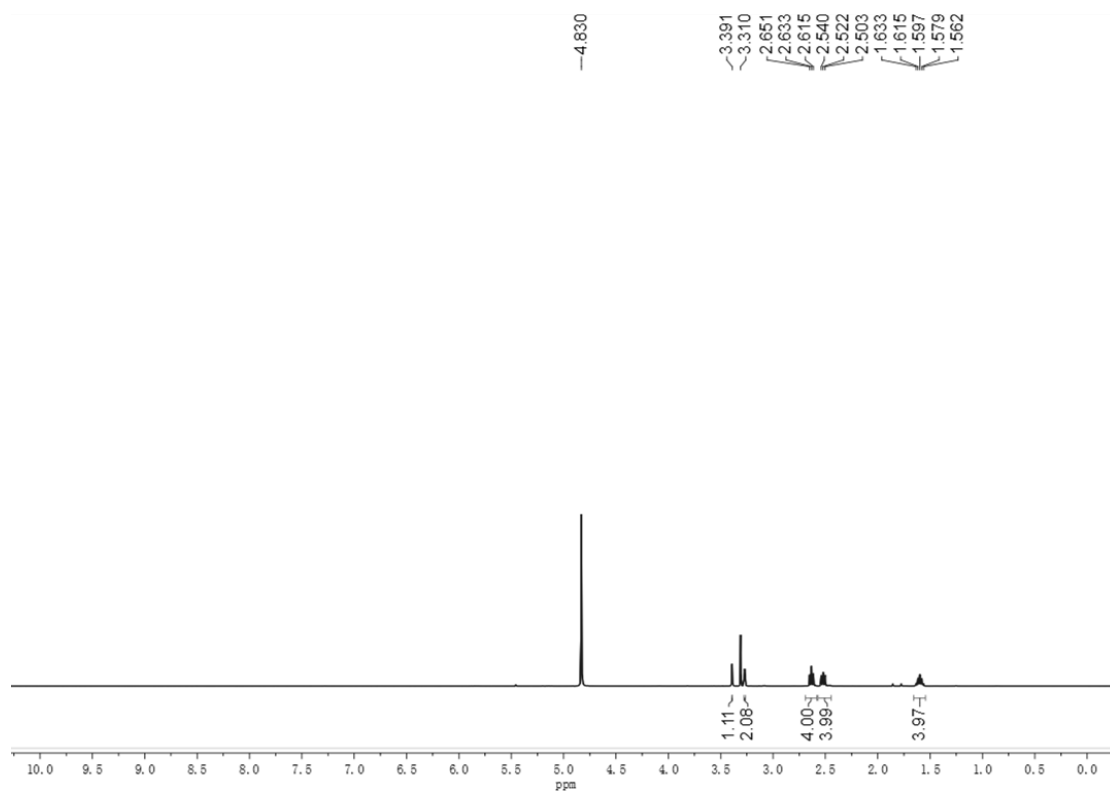

**Fig. S19.**  $^1\text{H}$  NMR (400 MHz,  $\text{CD}_3\text{OD}$ , 298 K) spectrum of **A**.

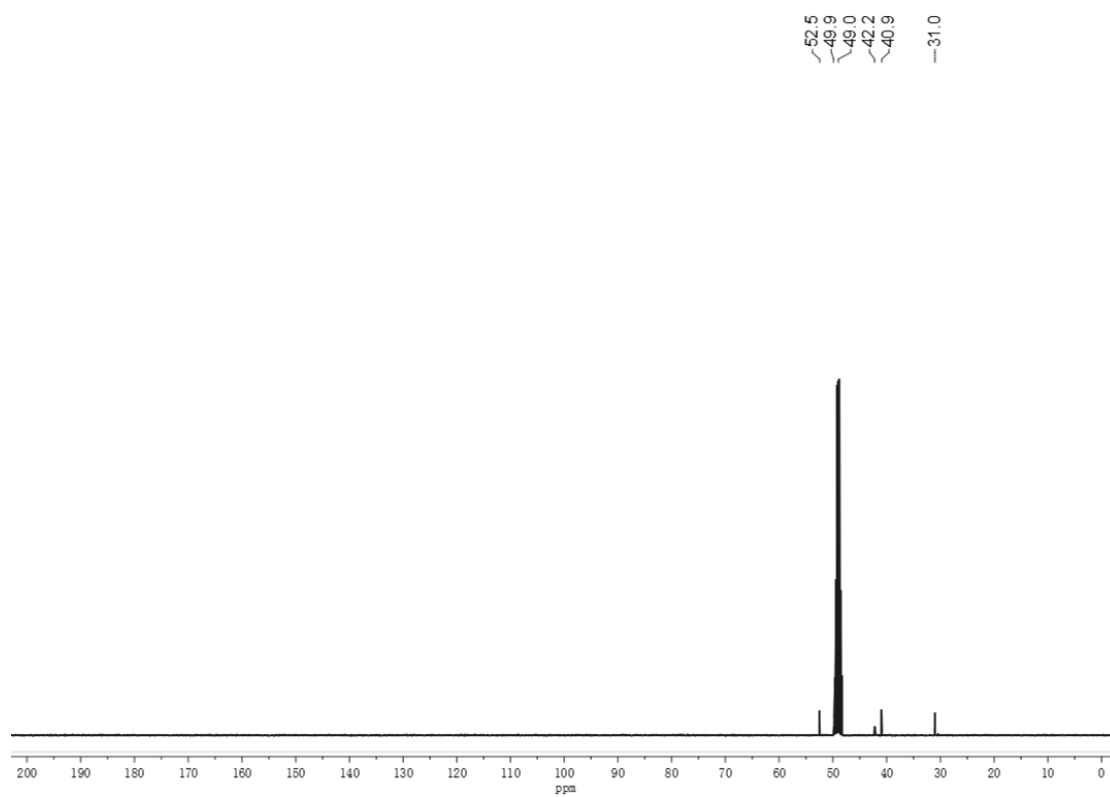

**Fig. S20.**  $^{13}\text{C}\{^1\text{H}\}$  NMR (100 MHz,  $\text{CD}_3\text{OD}$ , 298 K) spectrum of **A**.



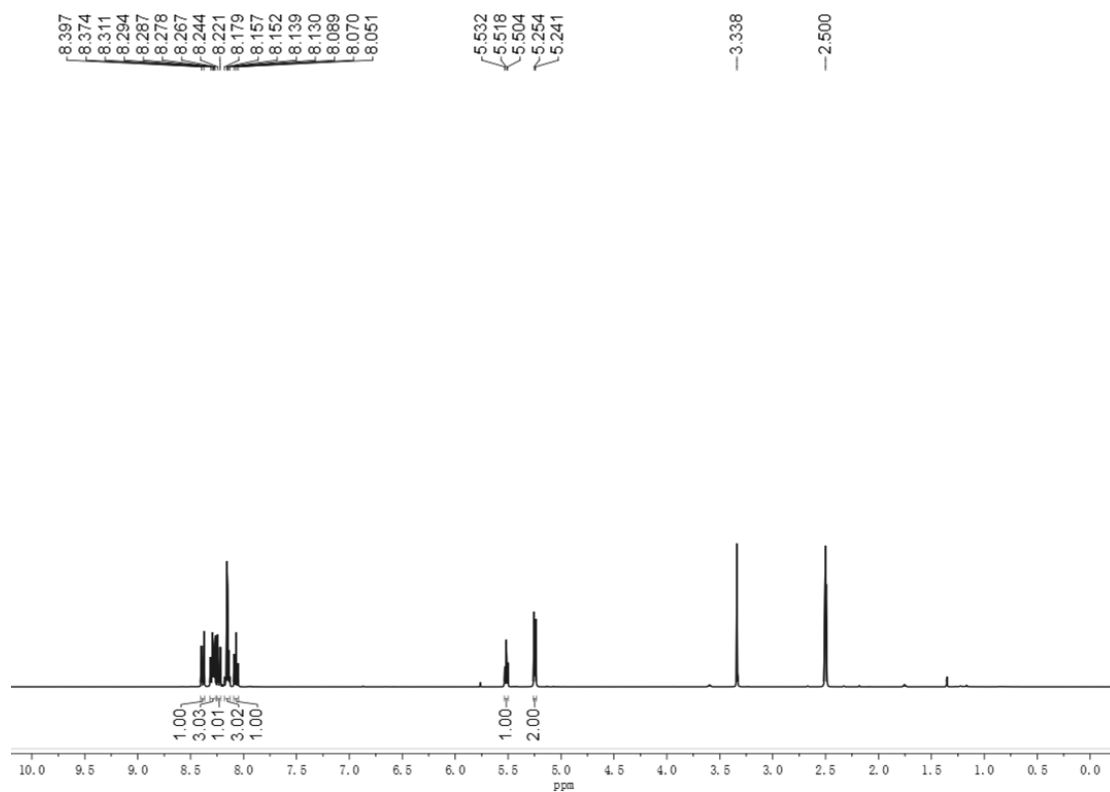

Fig. S21.  $^1\text{H}$  NMR (400 MHz,  $\text{DMSO-}d_6$ , 298 K) spectrum of **Py-OH**.

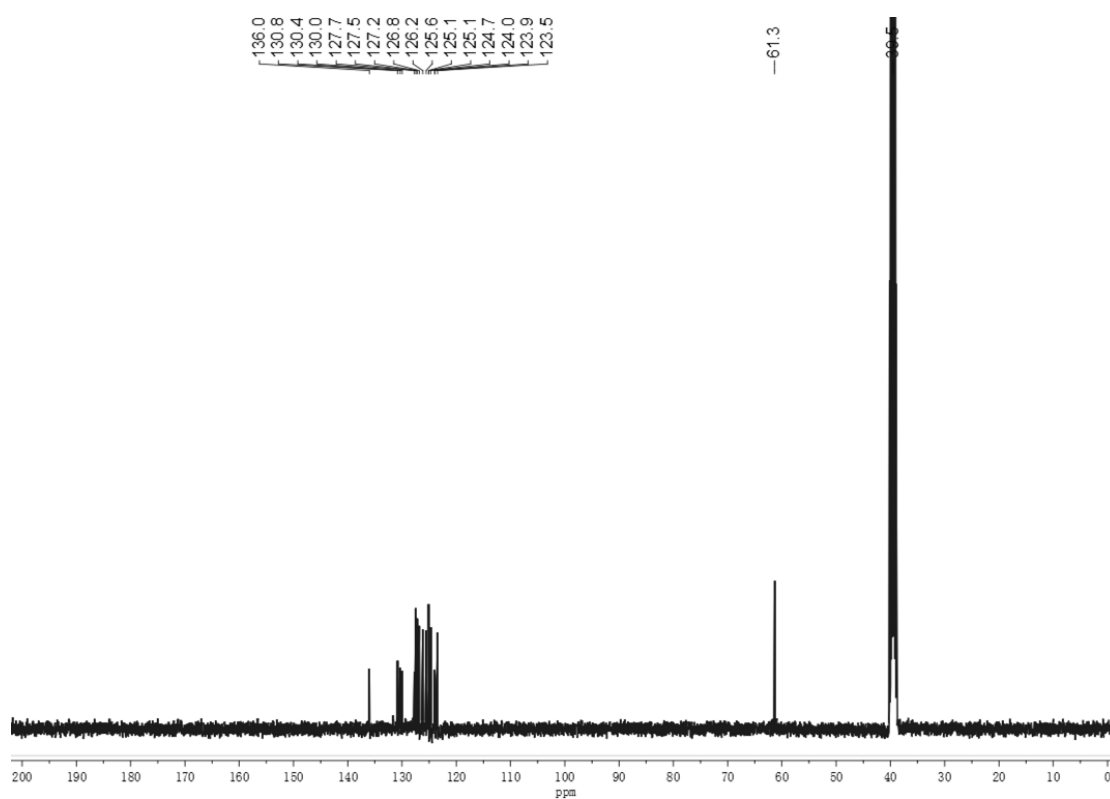

Fig. S22.  $^{13}\text{C}\{^1\text{H}\}$  NMR (100 MHz,  $\text{DMSO-}d_6$ , 298 K) spectrum of **Py-OH**.

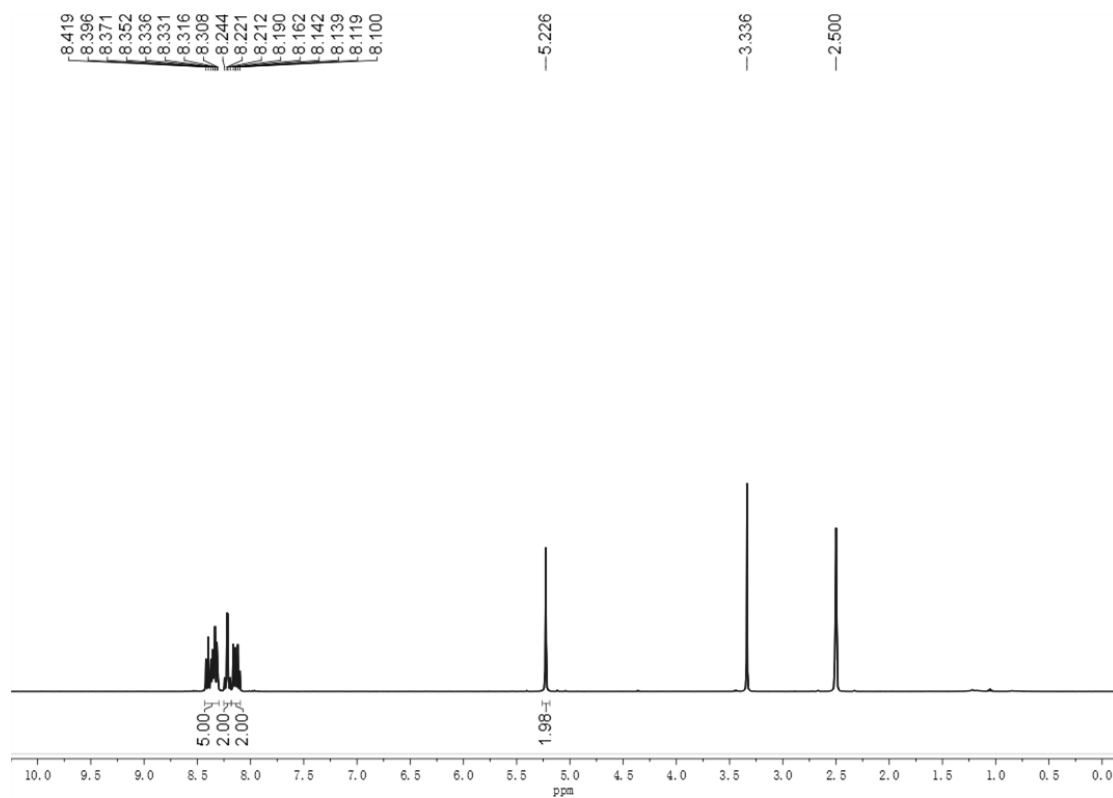

**Fig S23.**  $^1\text{H}$  NMR (400 MHz,  $\text{DMSO-}d_6$ , 298 K) spectrum of **Py-N<sub>3</sub>**.

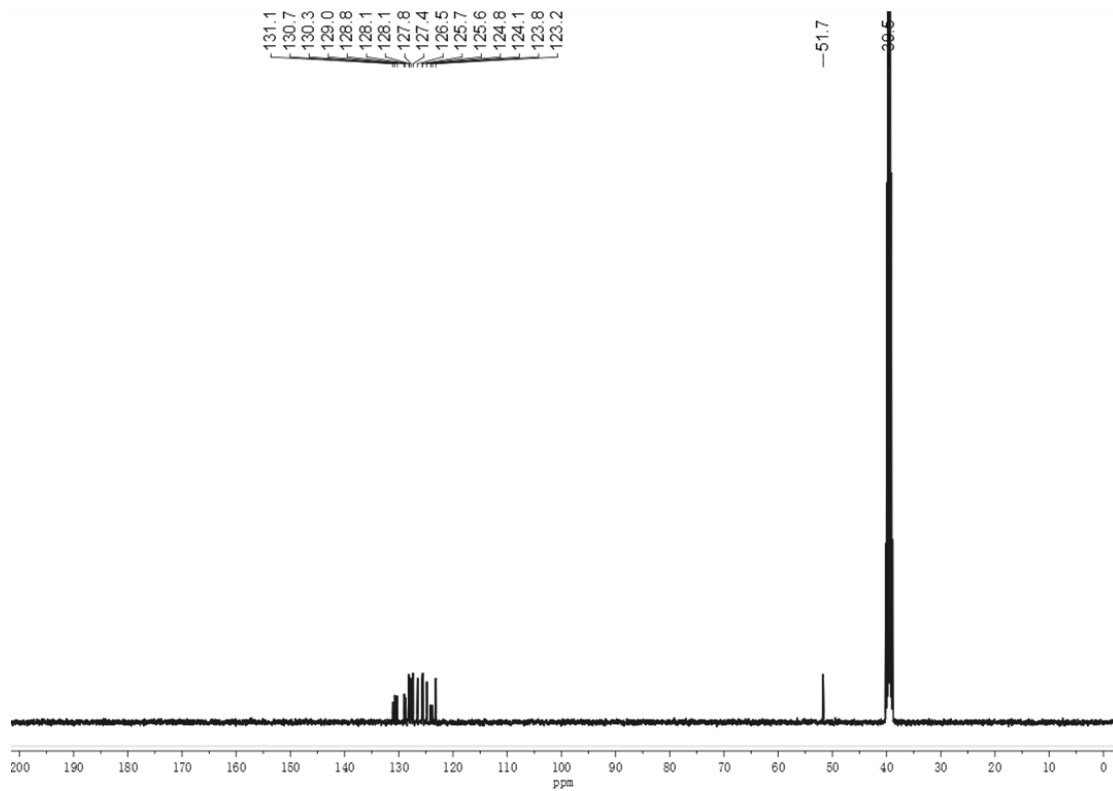

**Fig. S24.**  $^{13}\text{C}\{^1\text{H}\}$  NMR (100 MHz,  $\text{DMSO-}d_6$ , 298 K) spectrum of **Py-N<sub>3</sub>**.

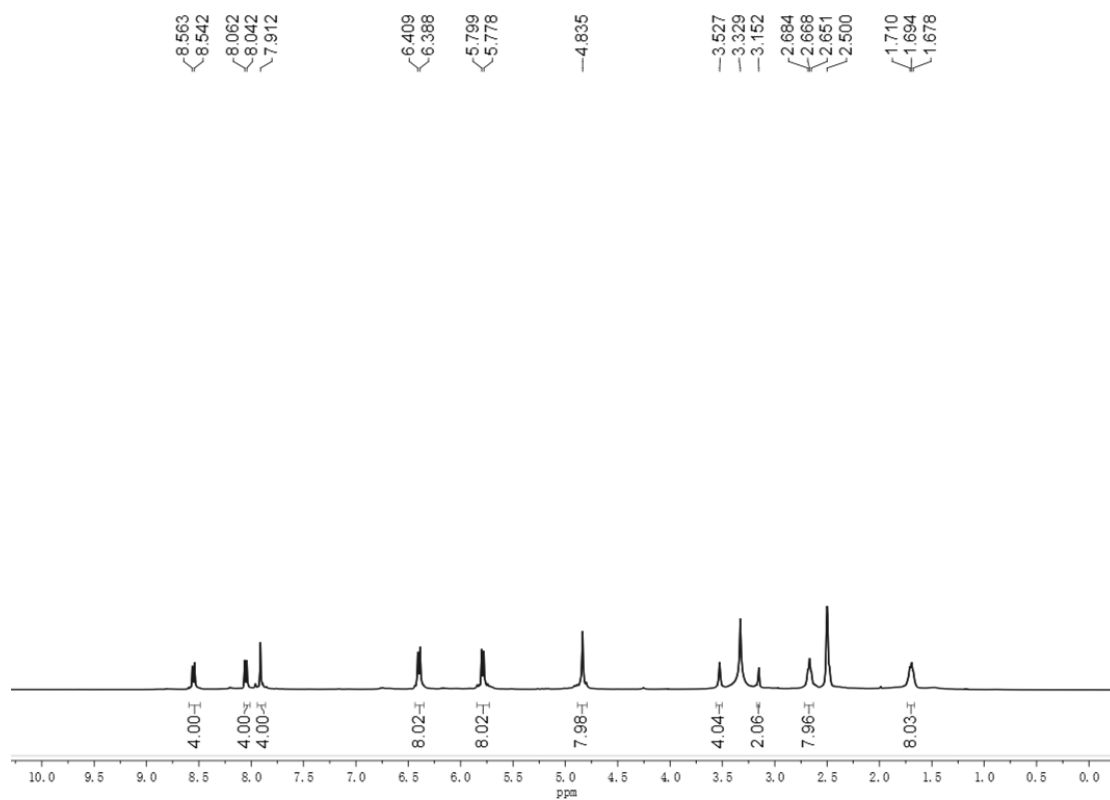

Fig. S25.  $^1\text{H}$  NMR (400 MHz,  $\text{DMSO-}d_6$ , 298 K) spectrum of  $[\text{Cu}(\text{1-alkyne})]\text{PF}_6$ .

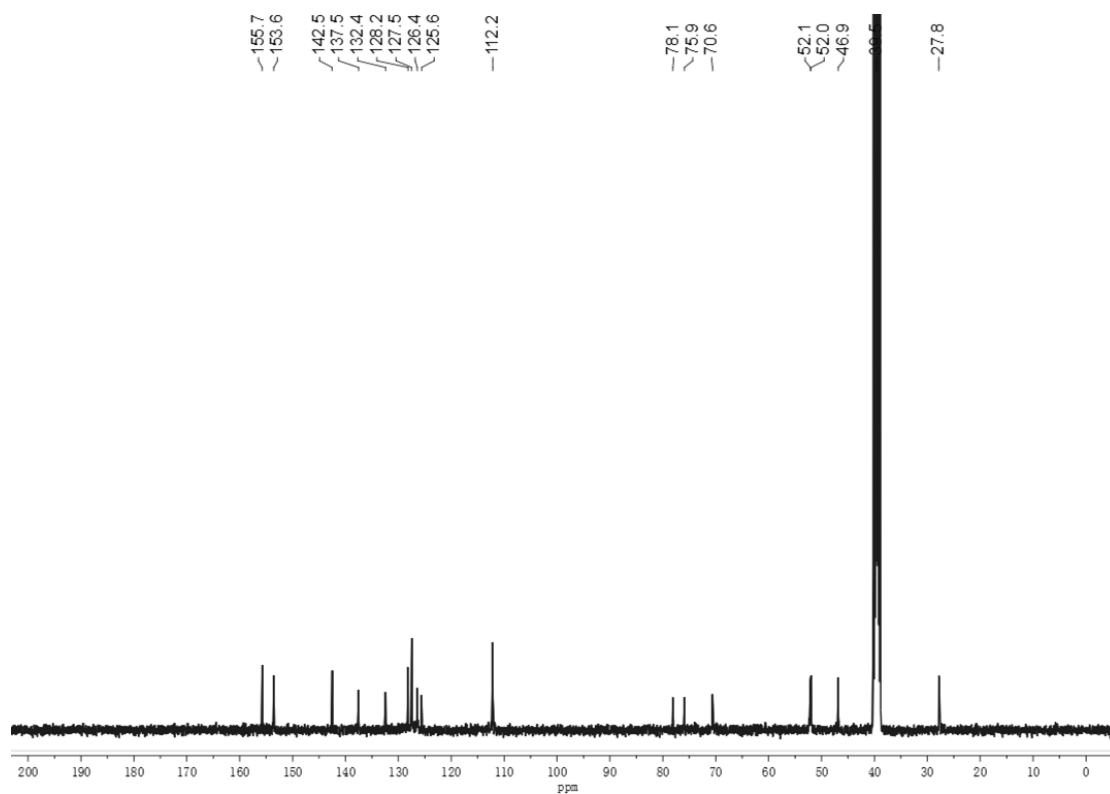

Fig. S26.  $^{13}\text{C}\{^1\text{H}\}$  NMR (100 MHz,  $\text{DMSO-}d_6$ , 298 K) spectrum of  $[\text{Cu}(\text{1-alkyne})]\text{PF}_6$ .

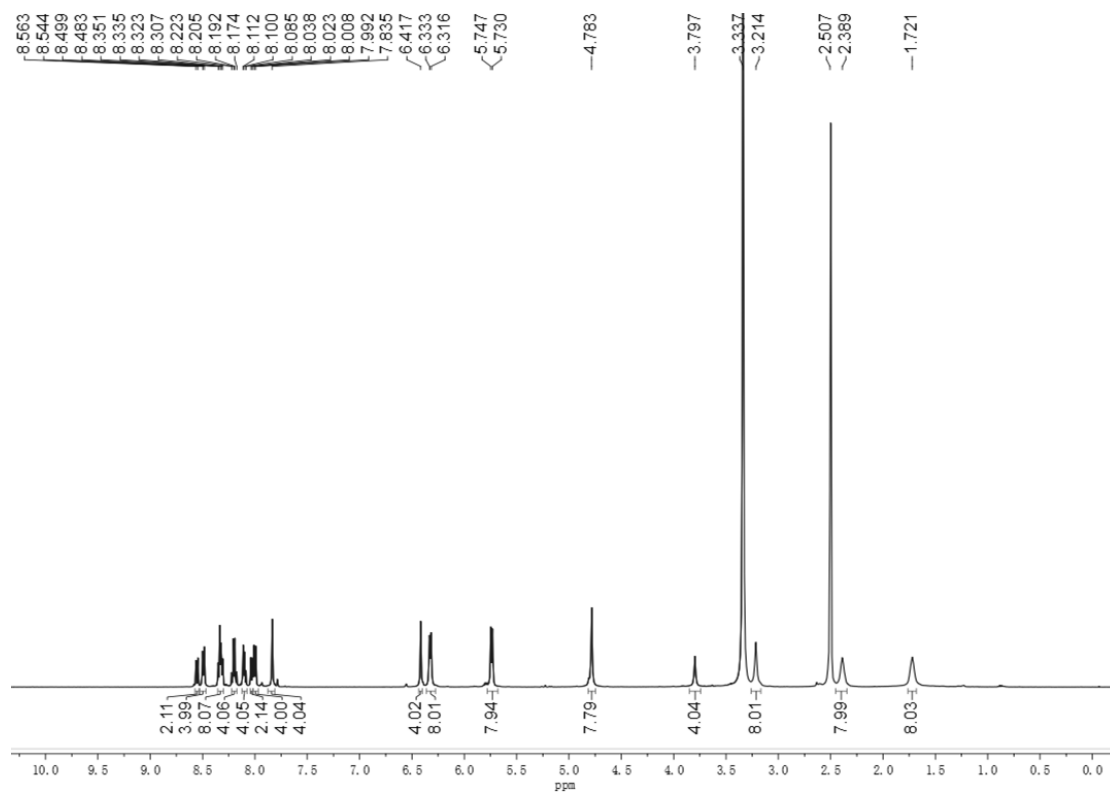

Fig. S27.  $^1\text{H}$  NMR (500 MHz,  $\text{DMSO-}d_6$ , 298 K) spectrum of  $[\text{Cu}(1)]\text{PF}_6$ .

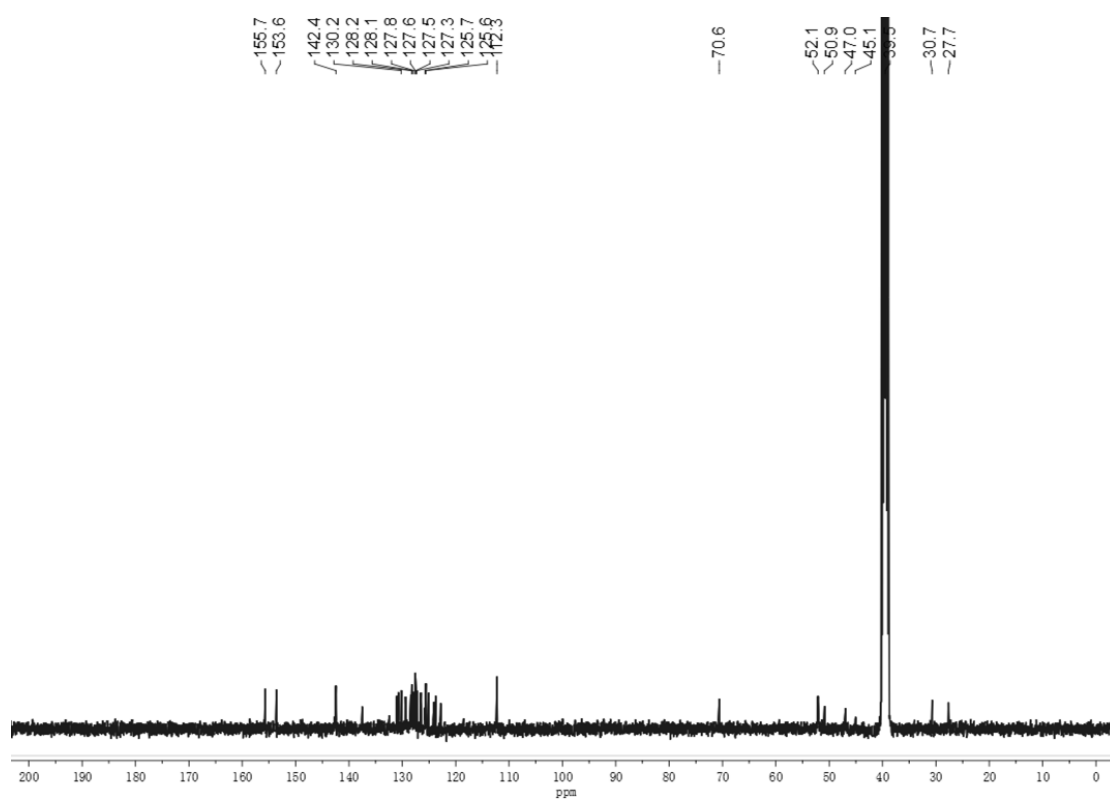

Fig. S28.  $^{13}\text{C}\{^1\text{H}\}$  NMR (126 MHz,  $\text{DMSO-}d_6$ , 298 K) spectrum of  $[\text{Cu}(1)]\text{PF}_6$ .

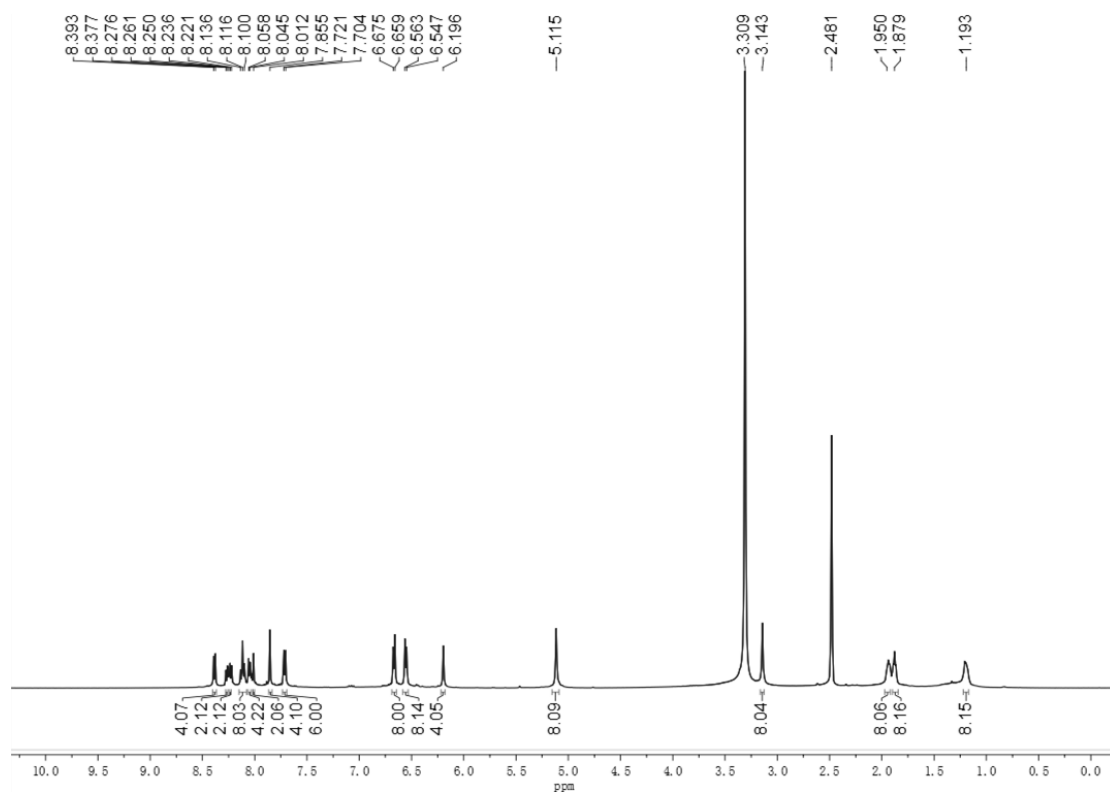

Fig. S29.  $^1\text{H}$  NMR (500 MHz,  $\text{DMSO-}d_6$ , 298 K) spectrum of **1**.

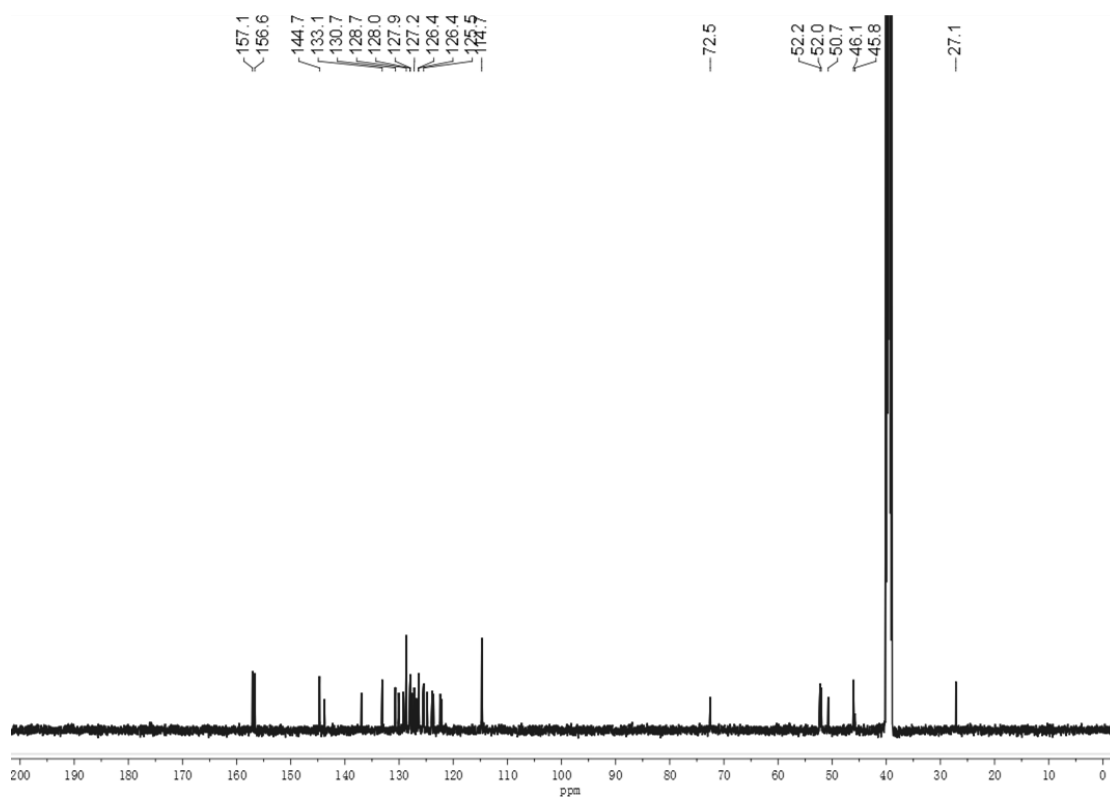

Fig. S30.  $^{13}\text{C}\{^1\text{H}\}$  NMR (126 MHz,  $\text{DMSO-}d_6$ , 298 K) spectrum of **1**.

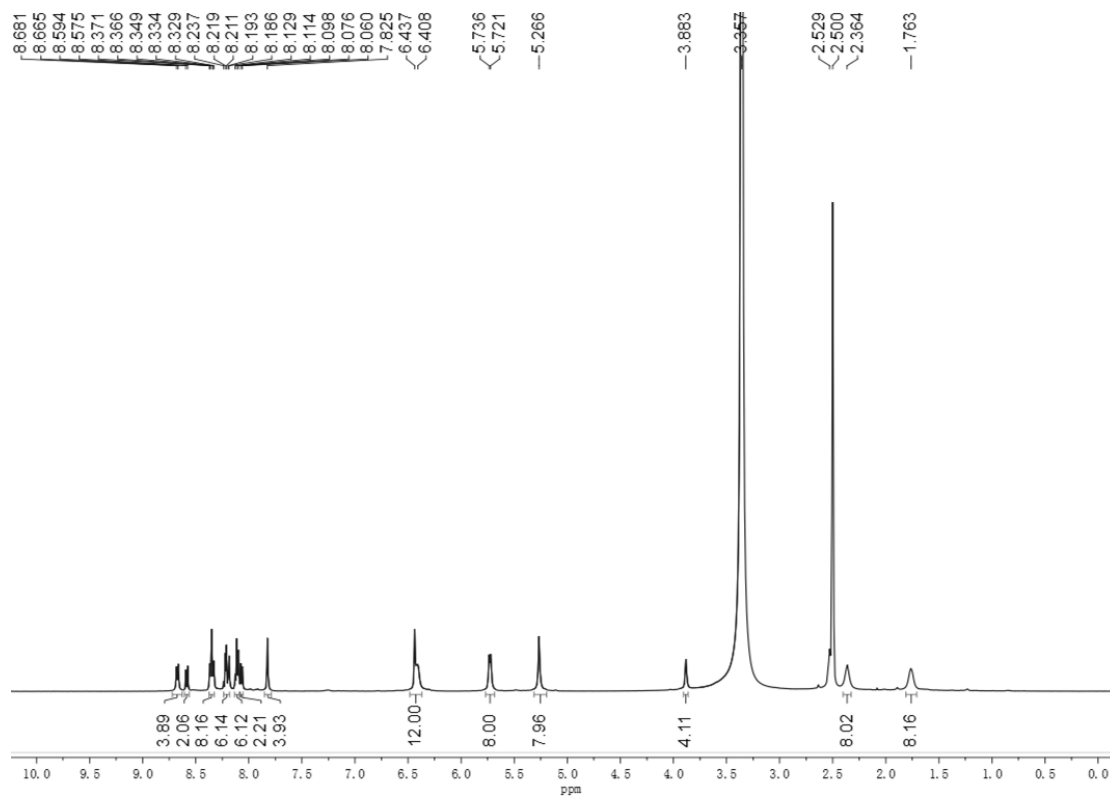

Fig. S31.  $^1\text{H}$  NMR (500 MHz,  $\text{DMSO-}d_6$ , 298 K) spectrum of  $[\text{Zn}(\mathbf{1})](\text{OTf})_2$ .

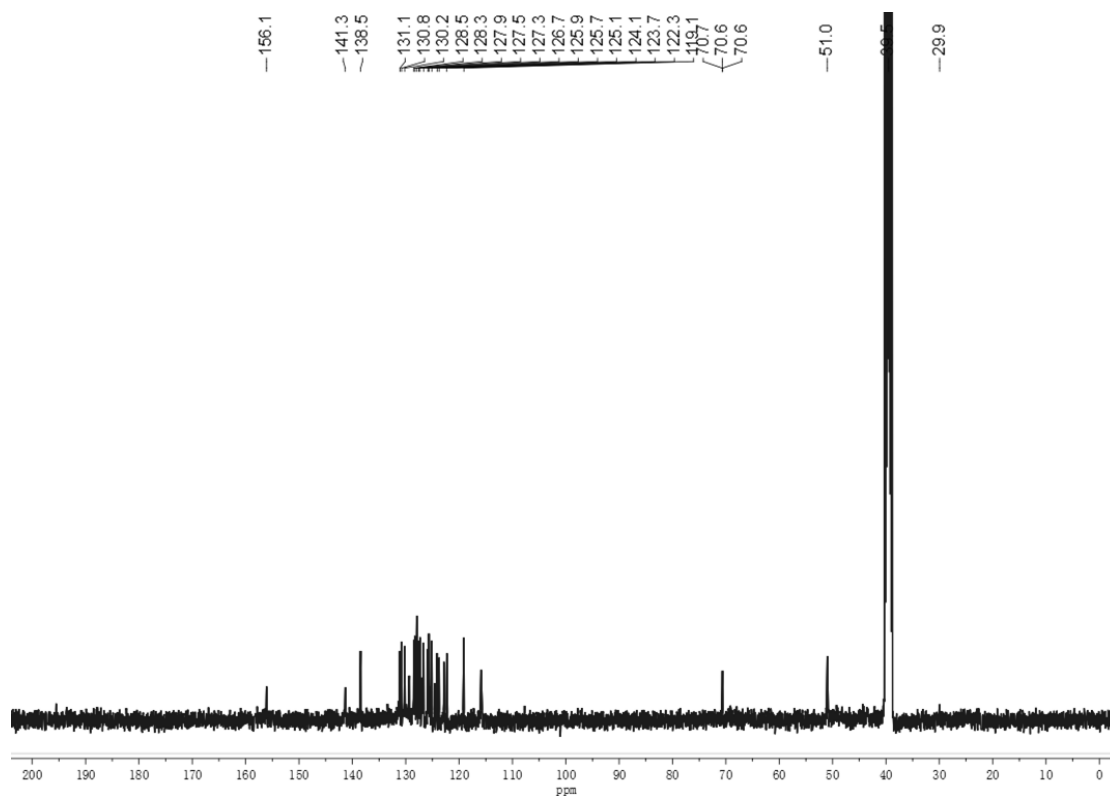

Fig. S32.  $^{13}\text{C}\{^1\text{H}\}$  NMR (126 MHz,  $\text{DMSO-}d_6$ , 298 K) spectrum of  $[\text{Zn}(\mathbf{1})](\text{OTf})_2$ .

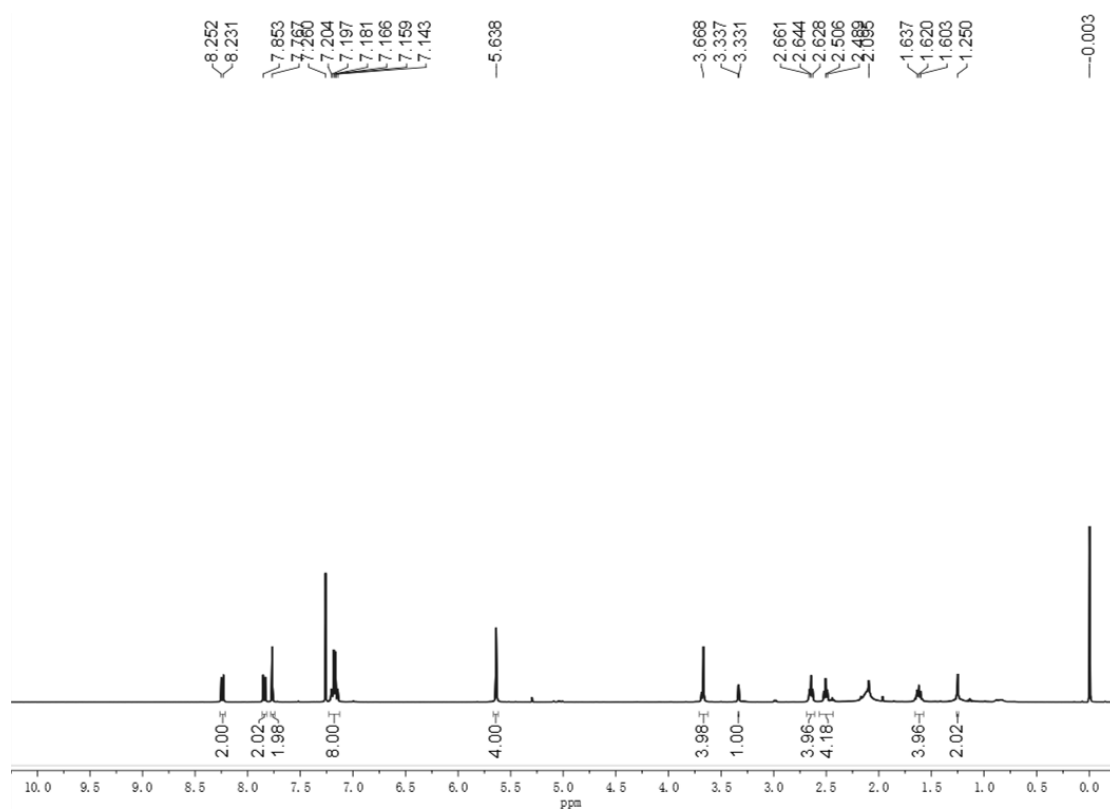

**Fig. S33.**  $^1\text{H}$  NMR (400 MHz,  $\text{CDCl}_3$ , 298 K) spectrum of **2-Alkyne**.

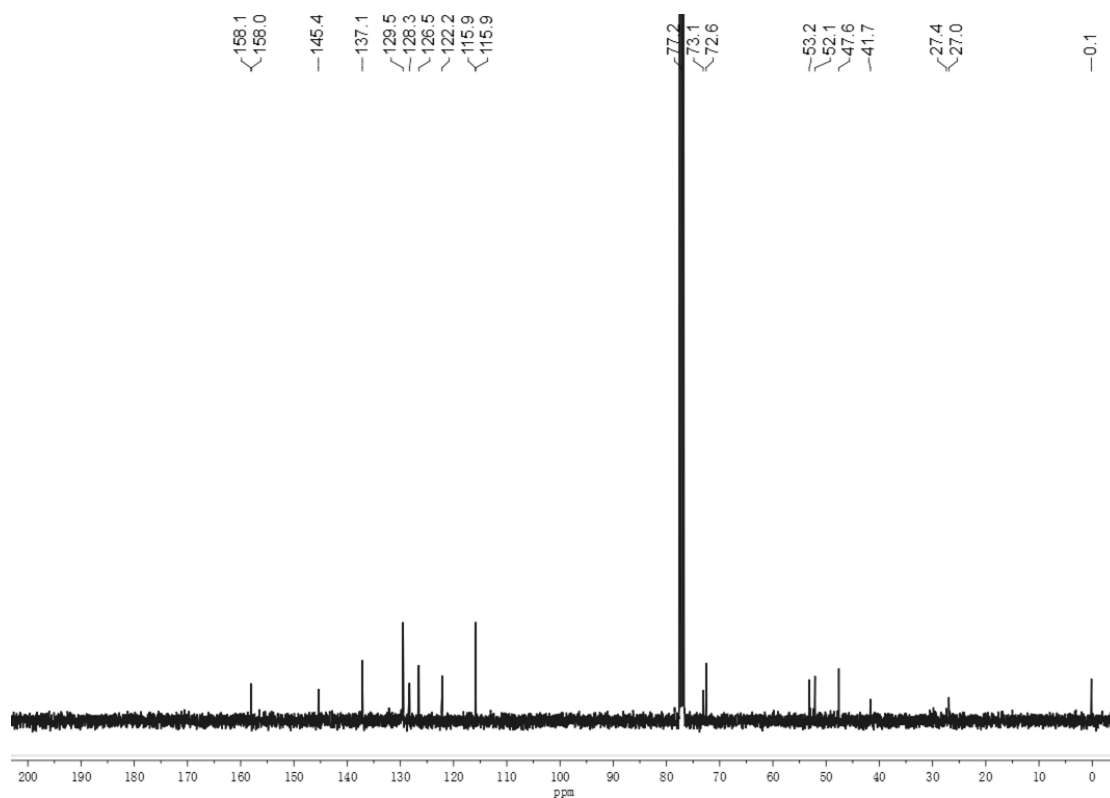

**Fig. S34.**  $^{13}\text{C}\{^1\text{H}\}$  NMR (100 MHz,  $\text{CDCl}_3$ , 298 K) spectrum of **2-Alkyne**.

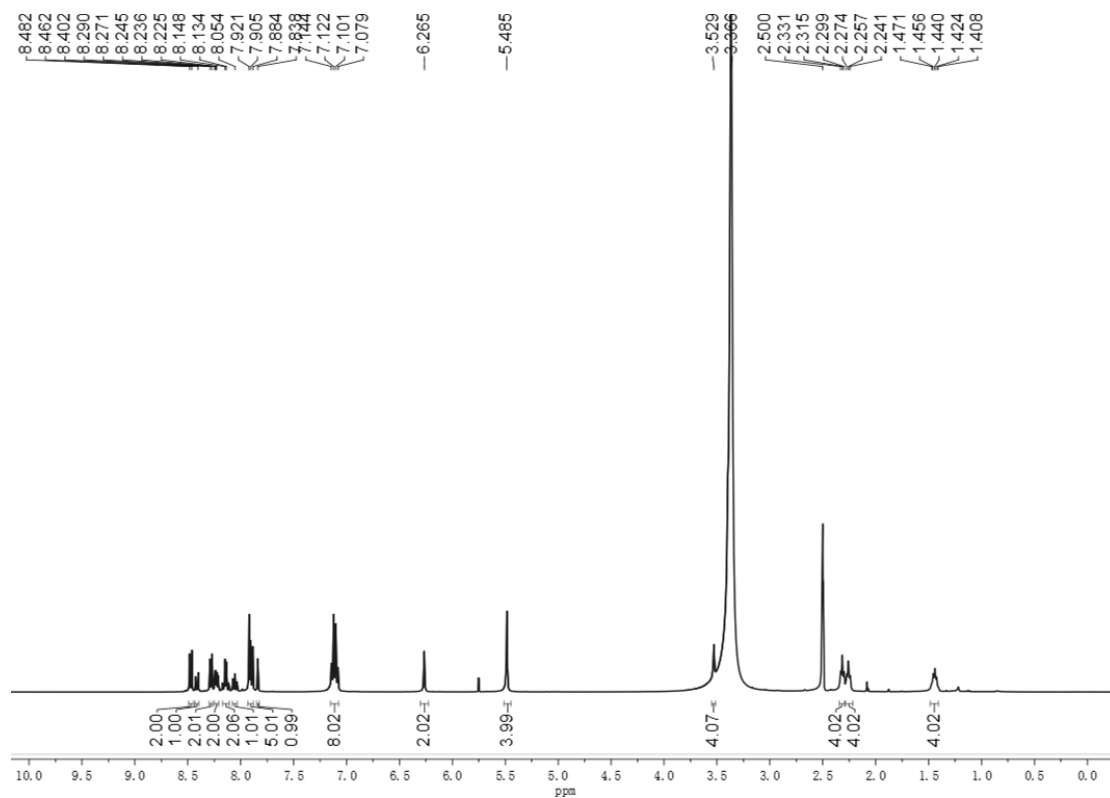

Fig. S35.  $^1\text{H}$  NMR (500 MHz,  $\text{DMSO-}d_6$ , 298 K) spectrum of **2**.

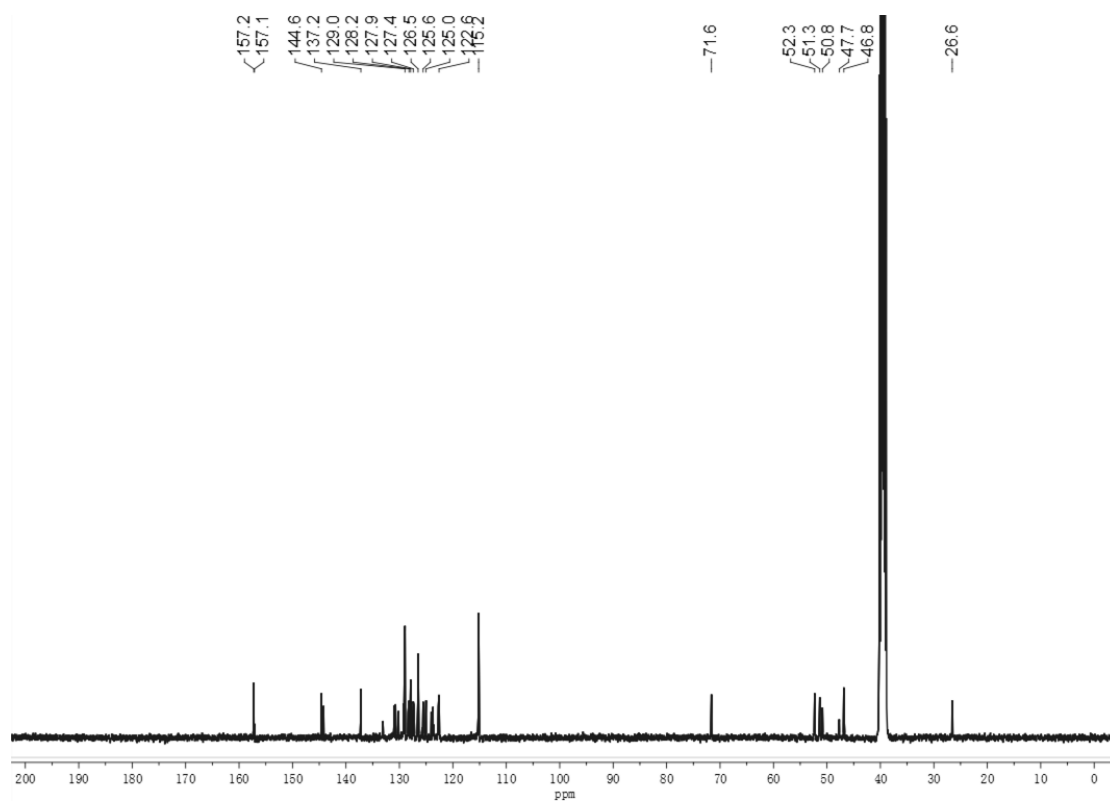

Fig. S36.  $^{13}\text{C}\{^1\text{H}\}$  NMR (126 MHz,  $\text{CDCl}_3$ , 298 K) spectrum of **2**.



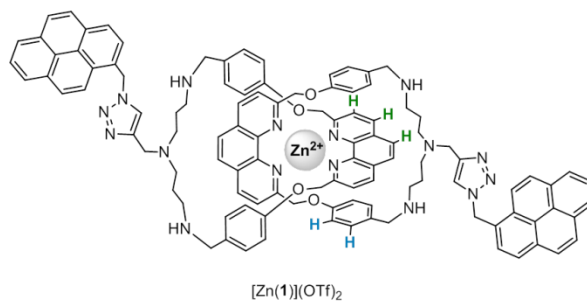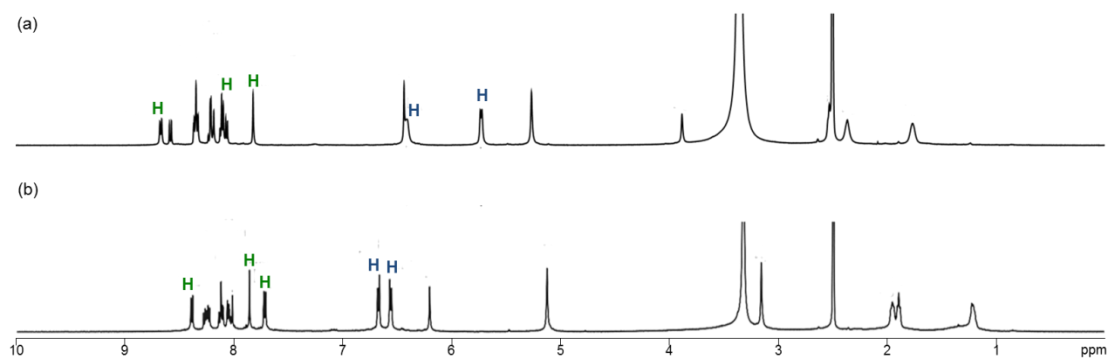

**Fig. S37.** Comparison of the <sup>1</sup>H NMR (500 MHz, DMSO-*d*<sub>6</sub>, 298 K) of (a) [Zn(1)](OTf)<sub>2</sub> and (b) **1**. The upfield shifted aryl proton signals upon Zn<sup>2+</sup> coordination is consistent with the parallel stacking arrangement with the phenanthroline.

## 5. High Resolution Mass Spectra

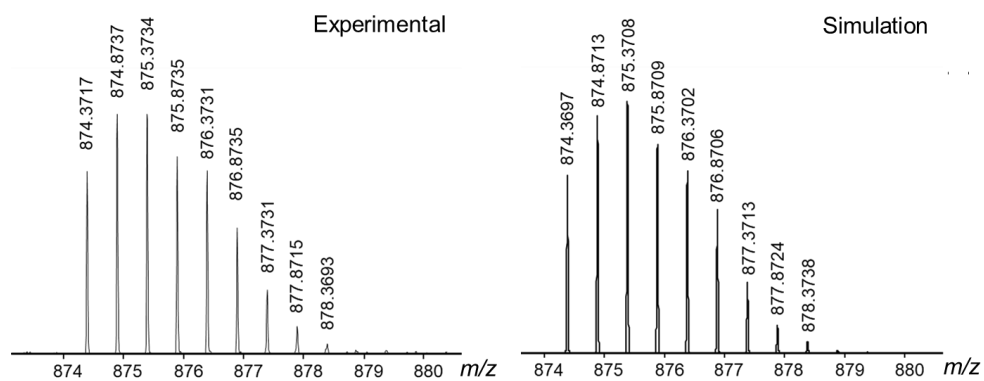

**Fig. S38.** HRMS of  $[\text{Zn}(\mathbf{1})]^{2+}$  at  $m/z = 875.3734$  (left: experimental; right: simulation).

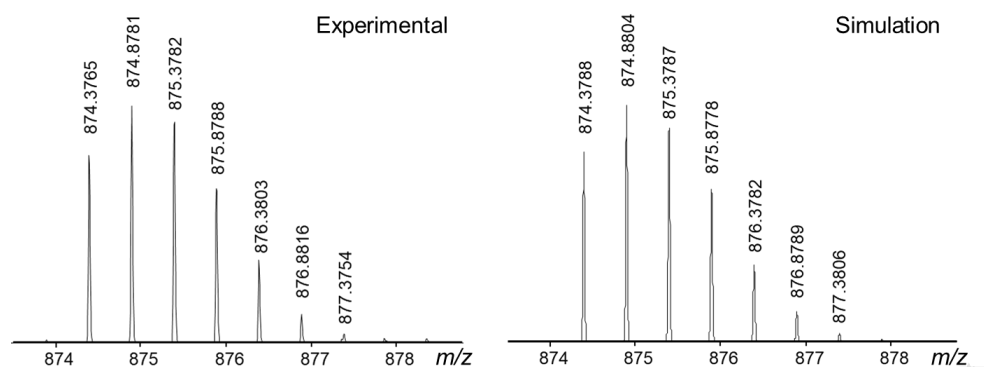

**Fig. S39.** HRMS of  $[\text{Cu}(\mathbf{1})+\text{H}]^{2+}$  at  $m/z = 874.8781$  (left: experimental; right: simulation).

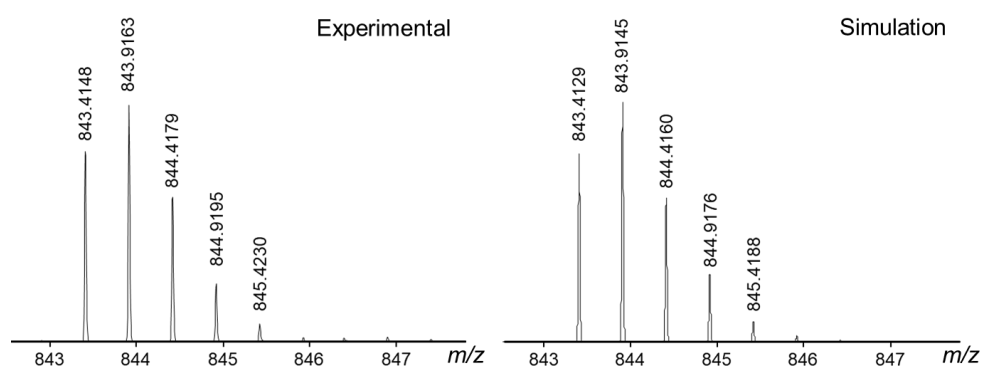

**Fig. S40.** HRMS of  $[\mathbf{1}+2\text{H}]^{2+}$  at  $m/z = 843.9163$  (left: experimental; right: simulation).

## 6. References

1. C.-C. Yee, A. W. H. Ng, H. Y. Au-Yeung, *Chem. Commun.* 2019, **55**, 6169
2. M. Cesario, C. O. Dietrich, A. Edel, J. Guilhem, J. P. Kintzinger, C. Pascard and J. P. Sauvage, *J. Am. Chem. Soc.*, 1986, **108**, 6250
3. H. J. Berendsen, D. van der Spoel, R. van Drunen, *Comput. Phys. Commun.* 1995, **91**, 43
4. A. D. MacKerell Jr, N. Banavali, N. Foloppe, *Biopolymers* 2000, **56**, 257
5. A. Pedretti, L. Villa, G. Vistoli, *J. Mol. Graphics Modell.* 2002, **21**, 47
6. V. Zoete, M. A. Cuendet, A. Grosdidier, O. Michielin, *J. Comput. Chem.* 2011, **32**, 2359
7. A. D. MacKerell Jr, D. Bashford, M. Bellott, R. L. Dunbrack Jr, J. D. Evanseck, M. J. Field, S. Fischer, J. Gao, H. Guo, S. Ha, *J. Phys. Chem. B* 1998, **102**, 3586
8. T. A. Halgren, *J. Comput. Chem.* 1996, **17**, 490
9. T. A. Halgren, *J. Comput. Chem.* 1996, **17**, 520
10. T. A. Halgren, *J. Comput. Chem.* 1996, **17**, 553
11. T. A. Halgren, *J. Comput. Chem.* 1996, **17**, 616
12. T. A. Halgren, R. B. Nachbar, *J. Comput. Chem.* 1996, **17**, 587
13. G. Ujaque, F. Maseras, O. Eisenstein, *Theor. Chem. Acc.* 1997, **96**, 146
14. T. A. Halgren, *J. Am. Chem. Soc.* 1992, **114**, 7827
15. P. P. Ewald, *Ann. Phys.* 1921, **369**, 253
16. B. Hess, H. Bekker, H. J. Berendsen, J. G. Fraaije, *J. Comput. Chem.* 1997, **18**, 1463
17. S. Kumar, S. Sarkar, B. Bagchi, *J. Chem. Phys.* 2020, **152**, 164507
